## RESEARCH ARTICLE

## Public health partnerships with faith-based organizations to support vaccination uptake among minoritized communities: A scoping review

Melodie Yunju Song<sup>1‡\*</sup>, Denessia Blake-Hepburn<sup>1‡\*</sup>, Anna Karbasi<sup>1</sup>, Shaza A. Fadel<sup>1,2‡</sup>, Sara Allin<sup>1,3‡</sup>, Anushka Ataullahjan<sup>1,4‡</sup>, Erica Di Ruggiero<sup>1,5‡</sup>

**1** Dalla Lana School of Public Health, University of Toronto, Toronto, Canada, **2** Clinical Public Health Division, Dalla Lana School of Public Health, University of Toronto, Toronto, Canada, **3** Institute of Health Policy, Management, and Evaluation, Dalla Lana School of Public Health, University of Toronto, Toronto, Ontario, Canada, **4** School of Health Studies, Faculty of Health Sciences, Western University, London, Canada, **5** Social and Behavioural Health Sciences Division, Dalla Lana School of Public Health, University of Toronto, Toronto, Canada

‡ MYS and DBH contributed equally to this work and share first authorship. SAF, SA, AA, and EDR contributed equally to this work and share co-senior authorship.

\* [yunju.song@utoronto.ca](mailto:yunju.song@utoronto.ca) (MYS); [denessia.hepburn@utoronto.ca](mailto:denessia.hepburn@utoronto.ca) (DBH)

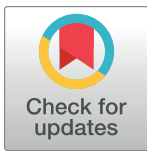

## OPEN ACCESS

**Citation:** Song MY, Blake-Hepburn D, Karbasi A, Fadel SA, Allin S, Ataullahjan A, et al. (2024) Public health partnerships with faith-based organizations to support vaccination uptake among minoritized communities: A scoping review. *PLOS Glob Public Health* 4(6): e0002765. <https://doi.org/10.1371/journal.pgph.0002765>

**Editor:** Abram L. Wagner, University of Michigan, UNITED STATES

**Received:** December 7, 2023

**Accepted:** April 22, 2024

**Published:** June 5, 2024

**Copyright:** © 2024 Song et al. This is an open access article distributed under the terms of the [Creative Commons Attribution License](https://creativecommons.org/licenses/by/4.0/), which permits unrestricted use, distribution, and reproduction in any medium, provided the original author and source are credited.

**Data Availability Statement:** All relevant data are cited within the paper where relevant and listed in the [Supporting information](#) files.

**Funding:** The study received an authorization of funding (AFF) from the Canadian Institutes of Health Research (CIHR; Grant #179239). The funder had no role in the design, collection, analysis, and interpretation of data, nor in the writing and decision to submit this manuscript for publication.

## Abstract

Faith-based vaccine initiatives are of growing interest to public health agencies who are looking to increase vaccine confidence among ethnoracially minoritized populations. Despite evidence that support faith-based organizations' (FBOs) partnerships with public health agencies (PHAs) to increase vaccine confidence, reviews on the scope and efforts to ensure equitable vaccination delivery for ethnoracially minoritized populations are scarce. We aimed to understand how public health agencies collaborate with FBOs or faith communities to improve vaccine confidence among minoritized communities in high-, low- and middle- income countries. We conducted a scoping review by searching OVID MEDLINE, Cochrane Library, Cumulative Index to Nursing and Allied Health Literature (CINAHL), SCOPUS, and PROQUEST from 2011 to 2023. We included case studies, news reports, observational studies, experimental, and quasi-experimental studies and multimedia content that describes PHA-FBO partnerships that created vaccine initiatives for marginalized and minoritized communities. The data was extracted, summarized, and results were described narratively. We included 167 initiatives reported in 160 publications; 83.8% of the included articles were published between 2019 to 2023. The interventions carried out by PHA-FBO partnerships attempted to increase vaccine uptake using any or all the following methods. First, the initiatives provided digital and in-person platforms for interfaith learning and established training programs to empower faith leaders to become vaccine ambassadors. Second, the initiatives designed and disseminated education and awareness materials that aimed to be sensitive to religious and gender norms. Third, PHA-FBO partnered to apply equity and faith-based frameworks and provided wrap-around support to enable equitable vaccine access. Majority of the initiatives reported that PHA-FBO partnerships improved vaccine confidence and uptake (71.3%). About 22.2% of the initiatives reported

**Competing interests:** The authors have declared that no competing interests exist.

quantitative outcomes post-intervention. PHA-FBO initiatives over the past decade increased vaccine uptake and acceptance among diverse ethnoracially minoritized populations. Reporting of faith-based initiatives are subject to publication bias and can be strengthened by examining more evaluation studies and establishment of key outcome indicators to critically appraise intervention outcomes.

## Introduction

Despite the benefits of vaccination, vaccine hesitancy, “the delay in acceptance or refusal of vaccination despite availability of vaccination services”, was declared a pressing global threat by the World Health Organization in 2019 [1–3]. Ethnoracially minoritized communities and populations—ethnic and racial groups who experience multiple forms of discrimination [4] have faced low vaccine confidence [5–7] due to a legacy of systemic racism and medical mal-treatments [8–10]. While terms such as ethno-racial, hard to reach, vulnerable and/or minority populations continue to be used in the literature, we intentionally use ethnoracially minoritized. Minoritization is a socially constructed concept as opposed to a naturally occurring phenomenon [11]. A group being minoritized does not imply a numerical minority, but rather that they are actively socially excluded. It explicitly acknowledges the power differentials that allow for those who are minoritized to also be systemically oppressed, marginalized and othered [11].

Public Health Agencies (PHAs), defined as “institutions or organizations with the authority responsible for, or advocate for public health matters as its official mission and mandate” [12], find strength in partnering with Faith-Based Organizations (FBOs), “entities whose organizational control, expression of religion, and program implementation are tied to values and beliefs belonging to specific religious identities” [13] that jointly apply principles of inclusivity, flexibility, and trust in community to promote vaccines [14]. The need to evaluate contemporary approaches to address hesitancy and increase vaccine confidence is needed, given the increased global rates of hesitancy [15].

Traditionally, reviews on PHA-FBO partnerships to increase vaccine confidence and uptake have focused on interventions in low-and middle-income countries (LMICs) [16–19]. Olivier and colleagues from the Joint Learning Initiative on Faith and Local Communities examined 43 examples of faith community participation in immunization programs in LMICs [17, 18]. Another review conducted by the Faith Engagement Team (FET) of the US Agency for International Development’s (USAID’s) MOMENTUM Country and Global Leadership program collected 110 studies on evidence of local faith actors (LFAs)’ influence on community vaccine hesitancy [16], and its most recent review described PHA-FBO partnership strategies that may improve COVID-19 vaccine confidence in four Sub-Saharan countries [19]. In addition to written reviews, conferences and panel sessions hosted by the World Health Organization (WHO), United Nations Children’s Fund (UNICEF), and Gavi, the Vaccine Alliance (Gavi)—offered collaborative opportunities for FBOs to share how PHA-FBO partnerships increase vaccine confidence and uptake in the context of low-and-middle income countries (LMICs) and open dialogues on issues of governance in equitable distribution [20–22].

In high-income countries (HICs), the documentation of PHA-FBO partnerships for vaccine interventions for minoritized communities largely consist of case studies [23, 24], recommendations [25], and PHA-disseminated toolkits [26–28]. An exemplar is the “Model Practices Framework” developed by Emory University’s Interfaith Health Program, whose

facilitation of FBO collaboration with the Centers for Disease Control and Prevention (CDC) and local Departments of Health increased influenza vaccine uptake [26, 29, 30], and later that of COVID-19 vaccines [31].

Reviews of FBOs as public health collaborators of publicly sponsored community-based initiatives for vaccine promotion are scarce. To date, we found a report commissioned by The National Academy of Sciences that synthesized 23 qualitative articles highlighting community partnerships with FBOs which influenced community decisions to vaccinate [32]. A recent systematic review of 37 studies showed FBO's ability to establish trust, mitigate barriers, disseminate and sustain efforts, and tailor public health campaigns, but did not examine interventions specifically for minoritized communities [33].

Despite applications of PHA-FBO vaccine interventions within the HIC and LMIC contexts, respectively, gaps remain with the description and analysis of PHA-FBO partnerships for engaging minoritized populations; the characteristics and outcomes of vaccine interventions; evidence of the theories/models/frameworks used to support the design, implementation, and evaluation of the intervention; and appraisal of implementation science theories/models/frameworks [34]. Given all the above, there is a need to characterize the various partnerships and approaches to strengthen the evidence for informing PHA-FBO engagement to promote vaccine confidence and uptake among minoritized communities.

The overarching question guiding our scoping review is: "How do public health agencies collaborate with faith-based organizations or faith communities to improve vaccine confidence among minoritized communities in HICs and LMICs?" Our objectives are to (1) describe the role of partners and collaborators involved in carrying out vaccine initiatives; (2) outline intervention strategies and implementation frameworks guiding interventions; (3) and synthesize outcomes and evaluations of PHA-FBO vaccine initiatives.

## Methods

### Protocol

Guided by the Joanna Briggs Institute (JBI) Scoping Review Method [35], a scoping review was conducted to map how PHAs, FBOs, and other organizations collaborate to improve vaccine confidence among ethnoracially minoritized communities. Scoping reviews are useful for identifying evidence gaps and determining conceptual patterns that emerge in an emerging field of study [36]; it is a suitable knowledge generation methodology to capture faith-based collaboratives for vaccine. A comprehensive description of our methods is described in our published protocol [37]. We applied the PCC (population, concept, and context) approach to align study selection with our research question (See Table 1) [38]. The protocol is registered

**Table 1. Population, concept, and context of search concepts.**

|            | Search Concept                                                                                                                                                                                                                                                                                                                                                                                                                                            |
|------------|-----------------------------------------------------------------------------------------------------------------------------------------------------------------------------------------------------------------------------------------------------------------------------------------------------------------------------------------------------------------------------------------------------------------------------------------------------------|
| Population | Minoritized communities with low vaccine uptake due to reasons of vaccine hesitancy, knowledge deficit, barriers to access, and cultural and personal beliefs. Minoritized communities broadly encompass ethno-racial and vulnerable populations who experience health inequities due to historic and systemic racism and social and cultural oppression.                                                                                                 |
| Concept    | The concept of PHA-FBO partnerships for vaccine confidence and uptake refers to partnerships formed to design, implement, and evaluate interventions delivered to the population of concern, which involve PHAs, departments of health, ministries of health, FBOs, and religious and spiritual leaders. The interventions may be based on theories, models, and frameworks of implementation science for the promotion of vaccine confidence and uptake. |
| Context    | The context of the intervention can occur in any geographic region in LMICs and HICs. The context can be virtual or in-person at a physical location.                                                                                                                                                                                                                                                                                                     |

<https://doi.org/10.1371/journal.pgph.0002765.t001>

with Open Science Foundation (OSF Registration number: <https://doi.org/10.17605/OSF.IO/DAX5Z>).

## Inclusion and exclusion criteria

We included documents that capture interventions to increase vaccine confidence and uptake that are jointly carried out by PHAs and FBOs, using the PCC-anchored keywords and concepts related to intervention AND *vaccine*\* AND *faith-based organizations* AND *public health agencies* (See [S1 File](#)).

**Information sources and literature search.** Comprehensive literature search was conducted from October 20, 2023 to October 30, 2023 on OVID MEDLINE, Cochrane Library, Cumulative Index to Nursing and Allied Health Literature (CINAHL), SCOPUS, PROQUEST-Public Health, PROQUEST-Conference Paper, PROQUEST- Policy File Index. Considering the changing landscape and wealth of community engagement approaches for vaccine uptake, only those published between January 1, 2011, and October 20, 2023, were searched. We included major vaccine preventable diseases eradication campaigns such as influenza (e.g., H1N1), polio, measles, and COVID-19.

The search strategy was piloted by two researchers (MYS and DB-H) and Medical Subject Heading (MeSH) terms were validated by a librarian using the PRESS checklist available in our protocol publication [37]. Hand searches in 11 document repositories for public health, 4 institutional archives, 8 websites, 6 journals, and 3 dissertation portals with substantive relevance in the implementation and research in faith-based initiatives and/or vaccination efforts were also performed. Finally, a Google Search Engine was performed to extract grey literature (e.g., reports, statements, media releases, webinars, and toolkits) for PHA-FBO partnerships from reputable news media, not-for-profit (.org), government (.gov), and research institutions (.edu,.ca). Reference scanning was performed on systematic reviews, review of reviews, and scoping reviews to determine if they contain relevant references that meet the inclusion criteria for extraction.

Detailed search strategies are documented in [S2 File](#). All search records (academic and grey literature sources) are documented in [S2 File](#) and imported into Covidence for database management and extraction [39].

## Study selection process

Two researchers (MYS and DB-H) calibrated the inclusion/exclusion criteria using a random sample of 20 titles and abstracts screened independently by each researcher. Using Covidence, each researcher's independent review was blinded to the other researcher. Weekly meetings were held to discuss and resolve differences in agreement and to clarify eligibility amongst the pair and a third member of the team (MYS, DB-H, TS). The title only progressed to full-text screening when the reviewers reached consensus.

Full-text screening was performed by four researchers (DB-H, MYS, TS, AK). Each document was screened by two researchers to progress to the extraction phase. We follow the checklist of the Preferred Reporting Items for Systematic Reviews and Meta-Analysis Extension for Scoping Review (PRISMA-ScR) [40].

## Data extraction and synthesis

A document extraction codebook was developed to extract relevant and consistent information from each document (See [S3 File](#)); each article was extracted by two researchers and validated by a third researcher.

To synthesize the included studies, we summarized the extracted information, including: (1) Document characteristics (i.e., type of publication, country economy, project name, year of publication); (2) Partners and their roles in the faith-based vaccine initiative (i.e., PHA partners, FBO partners, Other partners, and how these agencies collaborate with each other in the conceptualization, design, implementation, evaluation, and funding of the initiatives); (3) Main objectives and strategies of faith-based initiatives; including extraction of the study designs, models/theories/frameworks applied in the initiatives, religions and languages considered in initiative delivery, target population, recruitment process, initiative duration, number of participants recruited, number of vaccines administered, and participant characteristics; and (4) outcomes, to the extent available, including initiative results, findings, limitations, and future directions.

## Results

### Characteristics of included documents

Our search yielded 1361 results; 160 articles were included in this scoping review for analysis (See [Fig 1](#)).

Most were published between January 2019–October 2023 (134/160, 83.8%), while 26 articles (16.3%) were published between January 2011–December 2018; 167 initiatives were described based on 160 included articles. The number of initiatives is not the same as the number of documents collected, because one article may describe multiple initiatives (See [Table 2](#)).

COVID-19 vaccinations were the most common vaccines promoted among initiatives (122/199), followed by childhood vaccines (17/199), and polio vaccines (15/199). The target populations were mainly faith communities (78/332), ethno-racial and minority populations (50/332), and vaccine hesitant populations (36/332) (See [Table 3](#)).

The initiatives were carried out among 7 identified religions, including Christianity (160/331, 48.3%) and Islam (74/331, 22.4%) (See [Fig 2A](#)). Initiatives were delivered in 48 languages, majority in English (113/288, 39.2%), Spanish (31/288, 10.8%), and Arabic (8/288, 2.8%), as well as other languages such as Bedouin, Temne, Hmong, and Tongan (See [Fig 2B](#)) (See [S4 File](#)).

### Leadership among public health agencies (PHAs), faith-based organizations (FBOs) and other partners

PHAs, FBOs and other partners contributed to the implementation and delivery of initiatives to varying degrees. Initiatives were mainly co-led (37.7%, 63/167) by PHAs, FBOs, and other partners. PHAs conceptualized and designed 34.7% (58/167) of the initiatives. Research institutions and universities led 12.6% (21/167) of the initiatives (See [S5 File](#)). FBOs led 8.4% (14/167) of the initiatives and community-based organizations (CBOs) led 3.6% (6/167), while 3.0% (5/167) of the initiatives did not specify lead partner(s). In terms of program delivery, FBOs accounted for 28.5% (97/340) of the delivery personnel, including religious leaders and representatives from a faith community. Public health/global health professionals comprised 16.5% (56/340) of the delivery personnel, while healthcare professionals (e.g., physicians, nurses, pharmacists) comprised 14.1% (48/340) of personnel involved in the delivery of initiatives (See [S6 File](#)).

There were 38 frameworks, theories, models and strategies applied across 44 initiatives (See [Table 4](#)). Six theories/frameworks/models/strategies were identified in more than 2 articles, namely, the Social-Ecological Model (SEM) [41–44]; Community Based Participatory Research (CBPR) [44–48]; Community-Engaged Outreach (CEO) [49, 50]; Social and

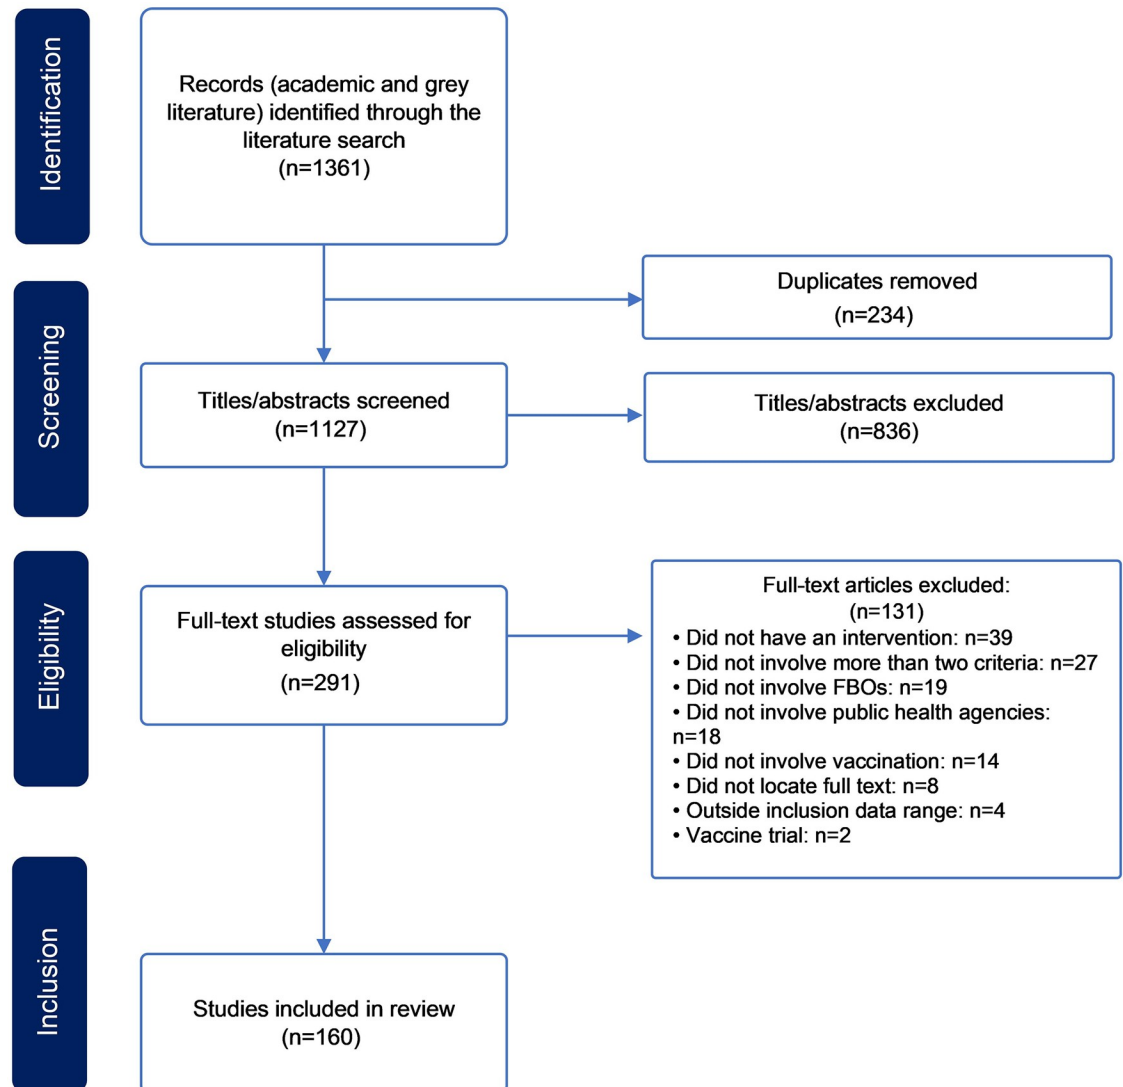

Fig 1. PRISMA ScR flowchart.

<https://doi.org/10.1371/journal.pgph.0002765.g001>

Behavioral Change Communication framework (SBCC) [41, 51]; Social Mobilization Implementation Theory and Strategy [52, 53]; and Consolidated Framework for Implementation Research (CFIR) [43, 54].

### Objectives and strategies of faith-based vaccine initiatives

Categorizing the initiatives by their intended objectives, faith-based vaccine initiatives mainly attempt to achieve the following: (1) enrolling faith leaders to support and promote vaccines, (2) increasing vaccine confidence among ethno-racial minorities, (3) increasing equitable access to vaccines. Strategies to achieve the objectives are described under each objective.

**Objective 1: Enrolling faith leaders.** Enrolling local faith leaders to support vaccines is one of the critical objectives that INGOs, faith-based humanitarian organizations, and social justice-oriented associations rely on to influence marginalized and vulnerable populations

Table 2. Grey literature characteristics.

|                     |                                                     | Count <sup>c</sup> | (%)  |
|---------------------|-----------------------------------------------------|--------------------|------|
| Year of publication | 2011–2014                                           | 15                 | 9.4  |
|                     | 2015–2018                                           | 11                 | 6.9  |
|                     | 2019–2023                                           | 134                | 83.8 |
|                     | <b>Total</b>                                        | 160                | 100  |
| Publication type    | Journal: PH                                         | 42                 | 26.3 |
|                     | Media article                                       | 39                 | 24.4 |
|                     | Journal: Medicine                                   | 16                 | 10.0 |
|                     | Journal: Social Science                             | 5                  | 3.1  |
|                     | Journal: Multidisciplinary                          | 5                  | 3.1  |
|                     | Other                                               | 53                 | 33.1 |
|                     | <b>Total</b>                                        | 160                | 100  |
| Country economy     | High Income Countries (HICs)                        | 101                | 63.1 |
|                     | Low- and Middle-Income Countries (LMICs)            | 30                 | 18.8 |
|                     | Multiple Countries                                  | 16                 | 10   |
|                     | Global                                              | 13                 | 8.1  |
|                     | <b>Total</b>                                        | 160                | 100  |
| Funding source      | Government <sup>1</sup>                             | 49                 | 30.2 |
|                     | Not Reported                                        | 45                 | 27.8 |
|                     | NGO/INGO                                            | 23                 | 14.2 |
|                     | University/Research <sup>2</sup>                    | 23                 | 14.2 |
|                     | Co-sponsorship or multiple sponsorship <sup>3</sup> | 17                 | 10.5 |
|                     | Faith Based Organizations                           | 4                  | 2.5  |
|                     | Industry                                            | 1                  | 0.6  |
|                     | <b>Total<sup>4</sup></b>                            | 162                | 100  |

<sup>1</sup> Including publicly funded public health agencies and hospitals.

<sup>2</sup> Includes government research grants, institutional funding, and donation of funds directly for non-partisan research-oriented institutions for the knowledge production and dissemination.

<sup>3</sup> Any sponsorship involving more than 2 types of organizations. Example: Government and NGO, NGO and faith-based organizations, government and research sponsored, together.

<sup>4</sup> The total number of funding sources is more than the total amount of articles included (n = 160) because some articles include multiple initiatives with different funding sources.

<https://doi.org/10.1371/journal.pgph.0002765.t002>

[42, 71, 81, 82]. Three main strategies to recruit faith leaders include facilitating interfaith learning; establishing vaccine training programs for faith leaders; and mobilizing faith leaders as vaccine ambassadors.

*Interfaith learning.* Interfaith learning was reported to accelerate knowledge exchange among diverse faiths via conferences, webinars, and in-person dialogues. Internationally, faith-based humanitarian societies (e.g., World Council of Churches (WCC) [83, 84], World Vision [83–85], Muslim Aid [22], Parliament of the World's Religions [86], Network for Religious and Traditional Peacekeepers (NRTP) [87, 88], Religions for Peace (RFP) [86, 89, 90] worked with public-health oriented INGOs (WHO, UNICEF, Gavi). Multi-faith leaders congregated to discuss practical means to vaccinate communities in low-resource high-risk settings [22, 73, 86], communities facing language barriers [62], those experiencing gender and race oppression [88], statelessness [83], and residents in conflict zones (e.g., Israel/Palestine, Sri-Lanka, Sierra Leone) [62, 91, 92].

**Table 3. Target populations and vaccines promoted.**

| <b>Intervention Population</b>                                                                 | <b>Count</b>           |
|------------------------------------------------------------------------------------------------|------------------------|
| Faith-based populations                                                                        | 78                     |
| Ethno-racial and minority populations                                                          | 50                     |
| Vaccine hesitant populations                                                                   | 36                     |
| Public health professionals, healthcare provider, and frontline workers                        | 33                     |
| Underserved and hard-to-reach populations (e.g., unhoused, transient, inaccessible, et cetera) | 30                     |
| Rural populations                                                                              | 25                     |
| Immigrants                                                                                     | 22                     |
| Low-income populations                                                                         | 19                     |
| People living in high-conflict zones                                                           | 8                      |
| People living with disability                                                                  | 8                      |
| Underprivileged urban populations                                                              | 8                      |
| Refugees                                                                                       | 6                      |
| Women                                                                                          | 4                      |
| <b>Total</b>                                                                                   | <b>327<sup>1</sup></b> |
| <b>Intervention by Age-Groups</b>                                                              |                        |
| Children (0–11)                                                                                | 26                     |
| Adolescents (12–18)                                                                            | 11                     |
| Adults (18–65)                                                                                 | 10                     |
| Seniors (65+)                                                                                  | 18                     |
| Not specified                                                                                  | 118                    |
| <b>Total</b>                                                                                   | <b>183<sup>2</sup></b> |
| <b>Vaccines administered</b>                                                                   |                        |
| COVID-19 vaccines                                                                              | 122                    |
| Childhood vaccines <sup>3</sup>                                                                | 17                     |
| Polio vaccines                                                                                 | 15                     |
| Measles, Mumps, and Rubella (MMR) vaccines                                                     | 12                     |
| Influenza (HiB) vaccines                                                                       | 12                     |
| Human papillomavirus (HPV) vaccines                                                            | 4                      |
| Hepatitis B vaccine                                                                            | 3                      |
| Diphtheria, tetanus, pertussis (DTap) vaccines                                                 | 3                      |
| Rotavirus (Rotavax) vaccines                                                                   | 2                      |
| Pneumococcal vaccines                                                                          | 2                      |
| Other vaccines <sup>4</sup>                                                                    | 3                      |
| Not Specified                                                                                  | 4                      |
| <b>Total</b>                                                                                   | <b>199<sup>5</sup></b> |

<sup>1</sup>Initiatives (n = 167) may target more than one target population.

<sup>2</sup>Initiatives (n = 167) may target more than one age-group.

<sup>3</sup>Include initiatives promoting multiple childhood vaccines that did not the specify vaccine type.

<sup>4</sup>Other: Avian flu (n = 1), Meningitis (n = 1), Pentavalent vaccines (DPT, HepB, HiB) (n = 1).

<sup>5</sup>Each initiative (n = 167) may promote/administer more than one kind of vaccine.

<https://doi.org/10.1371/journal.pgph.0002765.t003>

An example of global interfaith learning was the “*Communities of Practice (COPs)*” series hosted by WHO Information Network for Epidemics (EPI-WIN) which fostered continuous collaboration and dialogue among faith leaders with local knowledge on ways to approach vaccine hesitant communities in 5 different continents [93]. Second, WCC partnered with global public health and human rights agencies (i.e., United Nations High Commissioner for



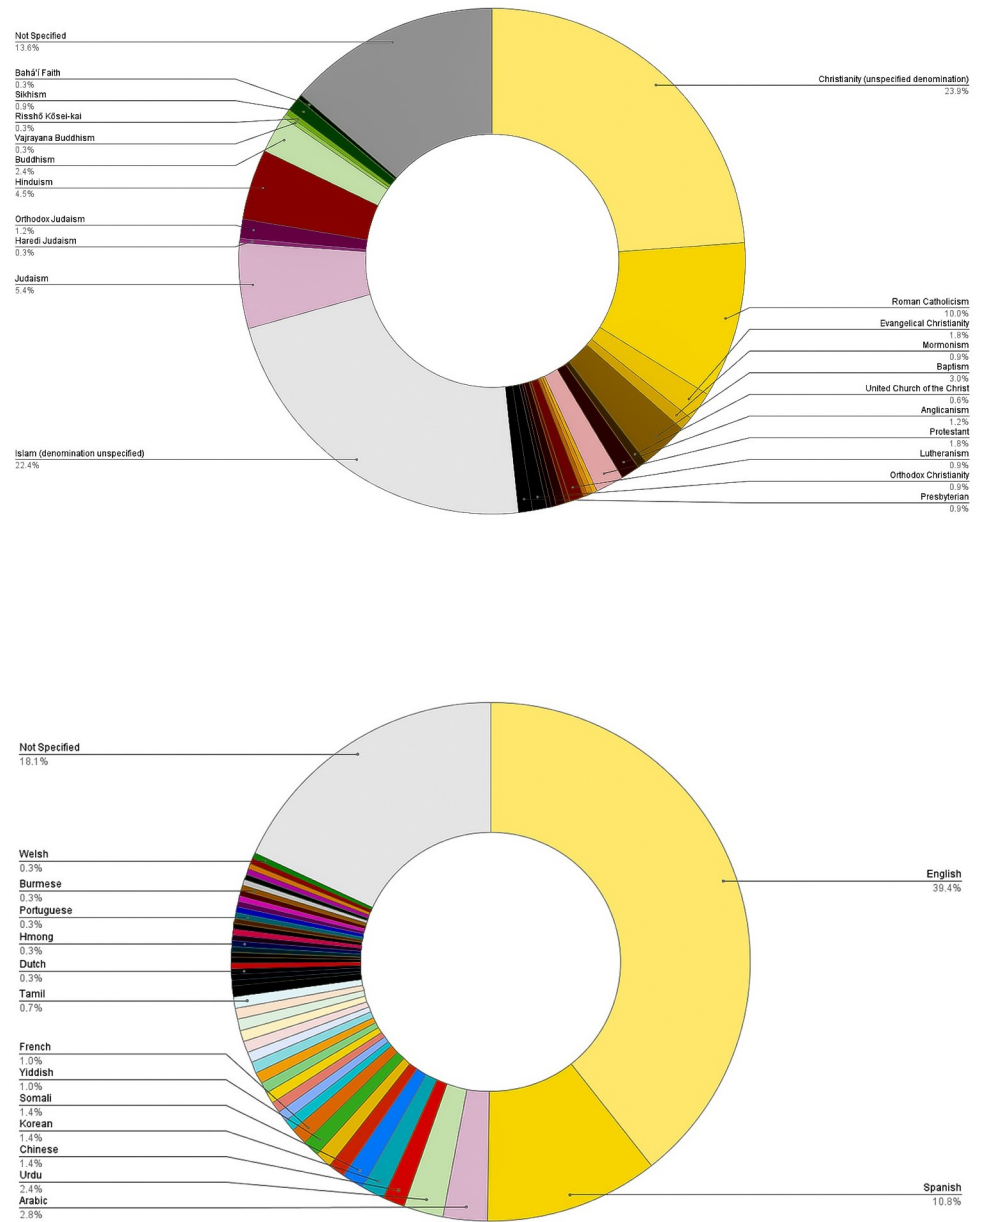

**Fig 2.** Religions involved in vaccine initiatives (2A); Languages applied in vaccine initiatives (2B).

<https://doi.org/10.1371/journal.pgph.0002765.g002>

Refugees, WHO-EPI WIN, UNICEF, and Gavi) to reach vulnerable communities of various Christian denominations in 28 countries [83].

Regional PHA-FBO initiatives facilitated dialogues in conflict-ridden communities. For instance, the Sri-Lankan Health Promotional Bureau created an interfaith network with local FBOs and NGOs to promote vaccination and overcome prevailing stigmatization that Muslims spread COVID-19 [62]. In the US, nationwide high-level inter-ecumenical coalitions such as the “Faiths4Vaccines” formed by The National Council of Churches and the Network for Religious and Traditional Peacemakers ensured equitable COVID-19 vaccine distribution and access for racialized populations [87].

**Table 4. Frameworks/model/theories/strategies used, and corresponding target population and vaccines promoted.**

| Theories, frameworks, models and strategies applied                                                                                          | Intervention demographic                                                                                                                                                                                                                                                                                                                           | Vaccines                                                  | N | References   |
|----------------------------------------------------------------------------------------------------------------------------------------------|----------------------------------------------------------------------------------------------------------------------------------------------------------------------------------------------------------------------------------------------------------------------------------------------------------------------------------------------------|-----------------------------------------------------------|---|--------------|
| The Social Ecological Model (SEM)                                                                                                            | Faith communities in LMICs; Marshallese communities in Arkansas, USA                                                                                                                                                                                                                                                                               | Childhood vaccines; COVID-19 vaccines                     | 4 | [41–44]      |
| Community Based Participatory Research (CBPR)                                                                                                | Christian Korean Americans in Texas, USA; Children in rural communities in India; Christian Marshallese and Hispanic communities in rural Arkansas, USA, Underserved Black community in New York, USA                                                                                                                                              | HepB vaccines; COVID-19 vaccines, HiB, Seasonal Influenza | 4 | [44–48]      |
| Community-Engaged Outreach (CEO)                                                                                                             | Vulnerable communities—older adults, those with preexisting conditions, racial and ethnic minorities, those with disabilities, and other vulnerable populations, Nevada, USA; Black communities, USA                                                                                                                                               | COVID-19 vaccines                                         | 2 | [49, 50]     |
| Social and Behavior Change Communication (SBCC)                                                                                              | Pregnant women and mothers with children in Ethiopia; African American church community in Georgia, USA                                                                                                                                                                                                                                            | Childhood vaccines, HPV vaccines                          | 2 | [41, 51]     |
| Social Mobilization Implementation Theory and Strategy                                                                                       | Areas with low coverage rate and low knowledge of vaccines in LMICs                                                                                                                                                                                                                                                                                | Childhood vaccines (e.g., MMR)                            | 2 | [52, 53]     |
| Consolidated Framework for Implementation Research (CFIR)                                                                                    | The Haitian-Creole community, the Cape Verdean community, the Latino community, the Black Christian Faith community, guardians who care for children living with disabilities, and individuals affected by systemic lupus erythematosus in the Boston area, Massachusetts, USA; Polio endemic LMICs, conflict-affected areas, communities of faith | COVID-19 vaccines, Polio                                  | 2 | [43, 54]     |
| Model Practices Framework                                                                                                                    | Vulnerable, at-risk communities, minority populations, USA                                                                                                                                                                                                                                                                                         | HiB                                                       | 1 | [14, 26, 30] |
| Behavioral and Social Drivers of Vaccination Framework                                                                                       | Global faith communities, trusted FBO/faith leaders                                                                                                                                                                                                                                                                                                | Not specified                                             | 1 | [55]         |
| Coalition Advocacy Framework                                                                                                                 | Global leaders of faith-inspired organizations                                                                                                                                                                                                                                                                                                     | Childhood vaccines <sup>1</sup>                           | 1 | [22]         |
| Community Engagement Framework (Ahmed and Palermo, 2011)                                                                                     | African American/Black, American Indian/Alaska Native, and Hispanic/Latinx community members Christian and Catholic communities in Arizona, USA                                                                                                                                                                                                    | COVID-19 vaccines                                         | 1 | [56]         |
| Community Health Worker (CHW) model                                                                                                          | People from diverse faith backgrounds reaching out to their religious and ethnic communities                                                                                                                                                                                                                                                       | COVID-19 vaccines                                         | 1 | [57]         |
| Conceptual framework of the drivers of vaccine delivery (Philips et al, 2017 & LaFond et al, 2015)                                           | Minority, religious groups, rural communities in Zambia                                                                                                                                                                                                                                                                                            | DTap vaccines                                             | 1 | [58]         |
| Cross-cultural Collaborative Model                                                                                                           | Faith-based African American communities in California, USA                                                                                                                                                                                                                                                                                        | COVID-19 vaccines                                         | 1 | [59]         |
| Framework for community engagement in interventions (Brunton et al., 2017)                                                                   | Black and Latino residents, seniors, younger adults, essential workers, Haitian community, Cape Verdean community, local businesses and groups in highly vulnerable urban areas in Massachusetts, USA                                                                                                                                              | COVID-19 vaccines                                         | 1 | [60]         |
| Health Belief Model                                                                                                                          | Black parents who are hesitant or unaware of HPV-induced cancers and vaccines in south central North Carolina, USA                                                                                                                                                                                                                                 | HPV vaccines                                              | 1 | [61]         |
| Health-Interfaith Community-Based Organization (CBO) COVID-19 Prevention Model; the Risk Communication Community Engagement (RCCE) Framework | Religious leaders, hard-to-reach vulnerable groups, general population in Sri Lanka                                                                                                                                                                                                                                                                | COVID-19 vaccines                                         | 1 | [62]         |
| Human-Centered Design (HCD)                                                                                                                  | Caregivers of under-immunized children in underserved and hard-to-reach locations in Nigeria                                                                                                                                                                                                                                                       | Childhood vaccines                                        | 1 | [63]         |
| Locally Driven Partnerships and Community-designed Solutions                                                                                 | Low-income groups, hard-to-reach groups in the USA                                                                                                                                                                                                                                                                                                 | COVID-19 vaccines                                         | 1 | [64]         |
| Operational Framework of Community Engagement through Faith-Based Organizations                                                              | Faith leaders across all provinces of India                                                                                                                                                                                                                                                                                                        | COVID-19 vaccines                                         | 1 | [65]         |
| Social Identity Theory                                                                                                                       | Vaccine hesitant Christians in USA                                                                                                                                                                                                                                                                                                                 | COVID-19 vaccines                                         | 1 | [66]         |
| Stakeholder Analysis                                                                                                                         | Local religious leaders that are influential among vulnerable populations to reach hard-to-reach and vaccine hesitant groups in Uttar Pradesh, India                                                                                                                                                                                               | Polio                                                     | 1 | [67]         |
| Taskforce on Racial Inclusion & Equity (TRIE) framework                                                                                      | Marginalized and underserved communities, Black and Latinx communities in New York, USA                                                                                                                                                                                                                                                            | COVID-19 vaccines                                         | 1 | [68]         |

(Continued)

Table 4. (Continued)

| Theories, frameworks, models and strategies applied                                    | Intervention demographic                                                                                         | Vaccines                     | N | References |
|----------------------------------------------------------------------------------------|------------------------------------------------------------------------------------------------------------------|------------------------------|---|------------|
| The 3R (Reframe, Reprioritize, and Reform) Communication Model                         | Parents/caregivers and their 12–17-year-old adolescents from three local churches in the Ashanti Region of Ghana | HPV vaccine                  | 1 | [69]       |
| The 5C psychological antecedents of vaccination (“5C”) model                           | Parents, community health workers, religious figures and leaders in Zambia, Nepal, and Senegal                   | Childhood vaccines           | 1 | [70]       |
| The Core Group Polio Project (CGPP) Secretariat Model                                  | Transient mobile/seasonal workers of Muslim faith in LMICs                                                       | Polio                        | 1 | [71]       |
| Vaccine Hesitancy Determinants and Matrix of Vaccine Hesitancy                         | Vaccine hesitant African American faith community in Missouri, USA                                               | COVID-19 vaccines            | 1 | [72]       |
| The Global Polio Eradication Initiative (GPEI) “Endgame” Strategy—community engagement | Areas with low polio vaccine confidence in North Nigeria                                                         | Polio                        | 1 | [73]       |
| The National Response Framework (NRF) for Emergency Management                         | Areas with high social deprivation in the USA                                                                    | COVID-19 vaccines            | 1 | [74]       |
| Training-of-Trainers (ToT) framework                                                   | Community members, correctional officers, and incarcerated jail residents in Westchester, New York               | COVID-19 vaccines            | 1 | [75]       |
| Trauma Informed Community Development                                                  | Church pastors to serve underserved, marginalized, at-risk communities, Black residents in Pennsylvania USA      | COVID-19 vaccines            | 1 | [76]       |
| The Supporting the Use of Research Evidence (SURE) Framework                           | Faith communities with low polio immunization rates in Nigeria                                                   | Polio                        | 1 | [77]       |
| The Theological Moral Framework of the Good Samaritan                                  | Hispanic Evangelicals with history of institutional low trust in science in the USA                              | COVID-19 vaccines            | 1 | [78]       |
| Theory of Change                                                                       | Muslim majority state in north-western Nigeria with below-average immunization coverage                          | Childhood vaccines and polio | 1 | [79]       |
| Community collaboration model; The Monitoring, Evaluation and Learning (MEL) Framework | Communities in underserved and rural locations, persons living with disability in India                          | COVID-19 vaccines            | 1 | [80]       |
| WHO Health Systems Framework; ‘Hit and Run’ Strategy                                   | Polio endemic LMICs, conflict-affected areas, communities of faith                                               | Polio                        | 1 | [43]       |

<sup>1</sup> Childhood vaccination: Include more than one childhood vaccination for the following diseases (e.g., Hepatitis A, Hepatitis B, Rotavirus, Influenza, Haemophilus Influenza type B, diphtheria, tetanus, Streptococcus pneumonia, varicella, measles, mumps, rubella, acellular pertussis).

\*Abbreviations: HIV: Human Immunodeficiency Virus; HepB: Hepatitis B Virus; HiB: Haemophilus Influenzae Type B Vaccine; HPV: Human Papillomavirus.

<https://doi.org/10.1371/journal.pgph.0002765.t004>

*Establishing training programs.* PHA-FBO initiatives focused on establishing vaccine training programs to empower faith leaders to become vaccine advocates and community ambassadors. Led by UNICEF [18, 53, 81], Cambodian monks and nuns were trained by UNICEF to join influenza campaigns [18]; similar programs were delivered to faith leaders in Angola, Ethiopia, India, Liberia, and Pakistan to deliver polio vaccine education in sermons and at in-home visits [53, 81], as well as engage in COVID-19 prevention efforts [94]. In HICs, the CDC and Association of State and Territorial Health Officials (ASTHO)—an organization representing the public health agencies of all 50 States and Territories in the US—participated in the “Engaging Communities in Response to Pandemic Influenza” project to engage FBOs in flu vaccine promotion, [95]; a survey revealed that ASTHO members that worked with FBOs viewed these partnerships as valuable for reaching ethno-racial minority groups [31].

FBOs with establishing networks such as World Vision and the Christian Relief demonstrated great capacity to lead PHA-FBO initiatives that recruit faith leaders for vaccine uptake [16, 96]. For instance, World Vision’s “Channels of Hope COVID-19 vaccine model” trained 8,000 Christian faith leaders of diverse denominations to design vaccine outreach strategies, resulting in a rapid mobilization of 400,000 faith leaders in 50 countries that reached rural and poor communities without television, radio, and internet access [19]. Regional FBOs like the Henry Ford Macomb Faith Community Nursing Network (FCNN), have offered training to

parish nurses and lay health ministers, on how to address misinformation and connect people to social resources to improve vaccine confidence [97].

*Recruiting faith leaders as vaccine ambassadors.* Another strategy was to recruit leaders as vaccine ambassadors. The intensity of engagement ranged from consultation with faith-based leaders to establishing task forces, working groups, and collaborative frameworks that empower community decision-making. PHAs were often the leaders of this strategy. PHAs offered funding opportunities for FBOs to conduct vaccine outreach and education [98, 99]. PH -and collaborative network-led vaccine ambassador programs were observed in both HICs and LMICs [65, 95, 100–102], which included a training component to equip ambassadors with the knowledge to promote vaccination; a similar FBO-led program was observed within the LMIC context [58]. Student mobilizers of faith communities were capitalized to promote vaccination in both LMICs and HICs [67, 74, 81, 103, 104]. For instance, the “Faith in the Vaccine” ambassador program sponsored by The Interfaith Youth Core (IFYC) trained religious youths to engage with their own religious/ethnic communities [57, 105]. PHAs also funded faith leaders to build community relationships among immigrant communities [48, 106], and further bolster their work with vulnerable populations [107]. As seen in tight-knit faith communities, ethno-racial minorities, and marginalized communities [96, 108–110], vaccine confidence among African Americans [72], Korean immigrant church goers [46], minoritized Jewish populations in the United Kingdom [111], and Rohingya refugees in Pakistan [112, 113] increased.

**Objective 2: Increasing vaccine awareness and acceptance among minoritized groups.**

PHA-FBO vaccine partnerships aimed to increase vaccine awareness and acceptance among communities that demonstrate mistrust towards the medical establishment, those who are uncertain whether their faith allows for vaccination, and ethno-racial minority groups with language/access barriers to vaccines and vaccine-related information. This objective builds on the first objective (enrolling faith leaders), because faith leaders’ receptivity and proactivity to collaborate with PHAs is a contributor of vaccine acceptance. Two strategies were used: awareness and education campaigns; and designing faith-sensitive vaccine communication.

*Awareness and education campaigns.* First, awareness campaigns were carried out via digital pathways. To generate educational materials, PHAs solicited the help of healthcare practitioners of faith (e.g., the American Muslim Health Professionals) [114] and dialogued with faith-based groups [115] to design and guide intervention efforts. Religious scholars endorsed and promoted vaccine safety and efficacy information from PHAs to mitigate hesitancy in their communities [45, 116–118], which was shown to improve communication of vaccine-related information and inspire willingness to receive the vaccine [45]. On more collaborative fronts, PHAs partnered with FBOs to launch multipronged educational campaigns via webpages, statements, webinars to combat myths and address safety and efficacy concerns from faith communities who mistrust government institutions and healthcare systems [116, 117, 119–121]. Faith-based digital media campaigns [122] and community-academic-faith-based partnerships were also shown to improve vaccination rates among targeted communities through the implementation of educational tools (i.e., coloured graphics that answer COVID frequently asked questions (FAQs)) [104].

Second, in-person gatherings in places of worship to promote vaccine confidence was used to approach communities with low vaccination literacy and vaccination rates [123]. Faith leaders partnered with local PHAs (e.g., Departments of Health, Ministry of Health) to promote vaccines in sermons [77, 81, 91, 97, 124, 125], which produced positive results [122]. “Pulpit swaps” allowed vaccine informed pastors to preach in other churches [19, 91]. Town hall events [115, 126–128], information sessions [129], Q&As [130, 131], and group meetings were

promotional strategies used to encourage vaccination [54, 70, 81, 91], which was particularly useful for promoting trust among hesitant communities.

Third, toolkits designed by PHAs and government/research institutions took the form of implementation guidelines, outreach strategies, and vaccine promotion materials in multiple languages for FBOs to promote confidence among hesitant, vulnerable, at-risk, and ethno-racial minority populations [26, 27, 55, 132–136]. Some of these toolkits had community engagement models co-developed with local faith communities [91, 132, 137]. For instance, in Zanzibar, public health engaged religious leaders in a co-creation workshop to develop a toolkit that addresses COVID-19 concerns which became a key vaccination strategy [138].

Fourth, FBOs played significant roles in fostering safe spaces for Black and Latino communities within the U.S. Both communities have experienced marginalization and discrimination within the health system but have long-standing collaborations with local PHAs and continuous health ministering programs that PHAs have supported. Black-church networks like “Choose Healthy Life” and “Black Coalition Against COVID-19” strengthened its partnership with PHAs, colleges and universities to put out vaccination guidelines [139, 140]. An academic-community-public health partnership led to the development of a linguistically and culturally-sensitive educational book on COVID-19 for community health workers to distribute among Black/Latino communities [104]. In Latino faith communities, faith leaders developed vaccination education material to equip church-going elders and parents with credible information to advise younger loved ones who were less likely to attend church to get vaccinated [110].

**Designing faith-sensitive vaccine communication.** Faith leaders released statements jointly with PHAs to promote COVID-19 vaccines’ morally acceptability and encourage vaccinations [80, 139, 141–145]. Faith leaders vaccinated publicly in front of congregations [19, 107, 139, 146, 147] and answered concerns with an understandable perspective that incorporated faith [103, 115].

First, engaged religious leaders cited passages from religious or spiritual/sacred text to promote the protective benefits of vaccines [19, 43, 67, 90, 91, 113, 139, 148, 149]. Editors of widely circulated religious magazines were enrolled by Global Polio Eradication Initiative (GPEI) to produce polio-vaccine promotional content in alignment with readers’ faith [113]. Social media was utilized by religious leaders (e.g., imams, ultra-Orthodox rabbinical scholars and pastors) to respond to vaccine concerns with justifications abiding to religious scripture [65, 119, 120, 139].

Second, campaigns adhering to religious gender norms were implemented. In HICs, vaccine stations for Muslim women were established for newcomers [116]. In LMICs, gender-sensitive campaigns were used in 7 majority Muslim countries where leaders separately addressed men and women on parental obligations to vaccinate children based on sacred text [81]; and women ambassadors were trained to address women of the same faith to increase vaccination rates among children in communities where male family members are vaccine resistant [91].

Third, messaging was also tailored based on linguistic and cultural understanding [47, 109, 150]. The National Latino Evangelical Coalition (NLEC) worked with the CDC and Health and Human Services to promote Spanish public service announcements on digital platforms [78, 139]. Israeli civil society organization, Kavod engaged with faith-based health practitioners to approach vaccine resistant communities in the Hasidic Jewish and Arab communities in Yiddish and Hebrew, and in Arabic among Israeli Arab communities, leading to increased vaccination rates [92, 151].

Fourth, some FBOs led the design of vaccine communication protocols and operational frameworks that adhered to religious practice for PHAs [82]. For instance, the Islamic Civic Society of America (ICSA) provided a guideline for PHAs to engage FBOs on the fence about

vaccines [82]. FBOs also led workshops for PHAs on their communities' beliefs and vaccine concerns that improved vaccine acceptance [152].

Finally, in countries with a state religion, rapid vaccine coverage was observed when PHAs partnered with faith leaders affiliated to the state. In Bhutan, the King, Prime Minister, and the Health Minister heeded advice from Buddhist monks to delay first vaccination in accordance with the Buddhist calendar, resulting in the country immunizing 93% of its adult population in 2 weeks and reaching 66% of the total population [153]. In polio endemic Afghanistan, the GPEI attributed increasing vaccination rates to the effort of the Department of Religious Affairs who distributed polio vaccine promotional briefs to mosques [43].

**Objective 3: Increase equitable access to vaccines.** The success of faith-based NGOs is rooted in addressing vaccine accessibility from equity-based approaches. At the G20 Global Health Summit, the Global Solidarity Fund (GSF) and COVID-19 Vaccine Global Access (COVAX) partners coordinated a "Vaccines for All" event, leveraging its network of 700,000 Catholic Sisters in 26 countries to identify and redirect vaccine delivery to regions where scale-ups and delivery were difficult and inequitable [154].

First, places of worship served as focal points for PHAs to establish a transparent and accessible platform to disseminate vaccine reminders for passive/uninformed members of the community. In LMICs, faith communities' vast volunteer networks were activated to facilitate vaccine appointment sign-ups [111, 155, 156]; and mosques and churches were staffed to call its members to show up at vaccine appointments [81, 91, 113] while also being used as vaccination sites [80]. In HICs, vaccine clinics were established at locations and times convenient to vulnerable ethno-racial communities, which were useful for addressing language barriers [44, 47, 64, 102]. Coalitions of PHAs, FBOs, and civil society NGOs organized mass vaccination sites at places of worship and vaccine drives. Longstanding PHA-initiated programs included the Minnesota Immunization Networking Initiative (MINI) [157] and White House Faith-Based and Neighborhood Partnerships [87]. Newer programs like the multi-faith "Faith 4 vaccines" initiative [158], National Black Church Initiative (NBCI) [109], National Latino Evangelical Coalition (NLEC) [78], Nevada Vaccine Equity Collaborative [159], and university-PH-FBO collaborative in Arkansas, US [44, 47] were exemplars in developing an equitable vaccination distribution plan and ensuring vaccine sites met the linguistic and cultural needs of the community. Data-driven strategies were used to determine areas with high social deprivation index disproportionately impacted by COVID-19 [74, 87].

Second, FBOs have long played an important role in hard-to-reach, war-torn and conflict zones [96, 160]. The Core Group Polio Project (CGPP) enrolled imams, pandits, and priests as partners of the Social Mobilization Strategy (SMS) to deliver polio vaccination. In war-torn Afghanistan, all health services were outsourced, such that local FBOs worked under political constraints and were funded by the government to immunize locals (ibid). In Pakistan, the Basic Integrated Rural Development Society's immunization program worked on remote areas of Khyber Pakhtunkhwa [91]. In Ethiopia, the CGPP enlisted key informants to connect with nomadic pastoralists whose mobile population's children are at high risk of polio to get vaccinated [81]; a similar method was also employed in Nigeria under the same global program [43].

Third, wrap-around services improved vaccine access among racial minorities, vulnerable, low-income, immigrant communities, and other groups like at-risk pregnant and young mothers, people experiencing homelessness, and transient populations in HICs. Coalitions such as the Interfaith Health Program [30]; the Muslim Association of Canada [116], the Edmonton COVID-19 Rapid Response Collaborative [161], and the Magen David Adom (MDA) [151], provided transportation, social services, food, shelter, and other income support for vaccine seekers; similar efforts were observed in LMIC context [145].

**Table 5. Outcomes reporting of the initiatives.**

| Reported Outcomes                                                                                                                                                                        | N (%)             | Initiatives                                                                                                                                                                     |
|------------------------------------------------------------------------------------------------------------------------------------------------------------------------------------------|-------------------|---------------------------------------------------------------------------------------------------------------------------------------------------------------------------------|
| Reported pre-post outcomes (cohort study, cross-sectional study, cross-case comparisons, quasi-experimental, cross-sectional surveys, randomized control trials, economic analysis, etc) | 37/167<br>(22.2%) | [19, 31, 43, 46, 52, 53, 57, 62, 63, 66, 69, 71, 73, 79, 88, 91, 105, 110, 113, 119, 122, 124, 131, 153, 158, 163–166, 168, 170–175]                                            |
| Reported number of participants reached                                                                                                                                                  | 42/167<br>(25.1%) | [30, 48, 57, 60, 61, 63, 64, 75, 78, 80, 91, 98, 100–102, 104, 109, 111, 112, 122, 127, 129, 143, 149–151, 155, 157, 166, 169, 170, 176–183]                                    |
| Reported number of vaccinations administered                                                                                                                                             | 26/167<br>(15.6%) | [31, 59, 60, 63–65, 68, 74, 80, 92, 94, 100, 102, 104, 122, 138, 139, 146, 147, 150, 156, 159, 169, 170, 184, 185]                                                              |
| Reported subjective outcomes from interviews                                                                                                                                             | 50/167<br>(29.9%) | [14, 22, 31, 41, 42, 44, 45, 50, 52, 54, 62, 65, 67, 71, 72, 76–78, 81–83, 88, 94, 97, 100, 101, 116, 121, 126, 128, 138, 142, 144, 146, 150, 152, 154, 157, 162, 167, 186–194] |
| Reported no outcomes                                                                                                                                                                     | 42/167<br>(25.1%) | [47, 55, 56, 58, 61, 64, 70, 82, 86, 90, 94, 98, 99, 103, 106–109, 114, 118–120, 130, 132, 133, 136, 140, 143, 145, 161, 167, 175, 178, 191, 195–203]                           |

<https://doi.org/10.1371/journal.pgph.0002765.t005>

**Reporting of outcomes.** Majority of initiatives reported that faith leaders improved vaccine uptake and confidence (119/167, 71.3%); these were mainly reported through subjective interviews, media reports, case studies, organizational reports, and webinars.

Three initiatives reported that the interventions produced mixed outcomes [76, 123, 151]. For instance, the state religion Romanian Orthodox Church had pockets of parishes with influential leaders who vocally opposed COVID-19 vaccines despite performing various charitable work for pandemic relief [123]. Three initiatives did not report successful intervention outcomes and expressed obstacles in dispelling vaccine misinformation among certain religious organizations such as the Muslim Rights Concern (MURIC) and the Nigerian Christ Embassy Church in Nigeria [88] and in two branches of Orthodox Protestant religious minority groups in the Netherlands [162]. One initiative reported low uptake in a Nigerian state due to mistrust of the COVID-19 vaccines [94].

A total of 37 initiatives reported positive quantitative intervention outcomes (22.2%). These included 12 quasi-experimental community trials [53, 62, 63, 69, 71, 73, 91, 96, 113, 153, 163, 164], 12 surveys [31, 57, 88, 105, 119, 122, 131, 137, 158, 165–167], 5 randomized controlled trials [46, 66, 79, 124, 168], 5 case studies [19, 110, 125, 169, 170], 2 mixed methods studies [43, 52], and one program evaluation [171]. A total of 42 initiatives reported number of participants reached and 26 reported number of vaccines administered (See Table 5).

## Discussion

Our study shows that PHA-FBO partnerships have increased, with over half occurring after 2015 and particularly during COVID-19. To note, the concepts guiding our search are guided by past reviews on the role of FBOs collaborating with public health partners to advance immunization initiatives in LMICs [17, 18]. We further expanded the literature search to incorporate initiatives in HICs that were aimed at increasing vaccine confidence and uptake among ethnographically minoritized communities. The reviewed studies suggest that setting broader parameters (i.e., search terms) for “minoritized communities” yielded substantial literature involving initiatives that are aimed at communities and populations from diverse racial and ethnic backgrounds.

Our review reveals that most initiatives were started and funded by governmental PHAs and public health international non-governmental organizations (INGOs). We also found that FBOs take on proactive leadership positions to identify areas in need and to organize vaccine communication and outreach that adhere to cultural and religious norms. The reviewed studies confirm that PHAs benefited from FBOs' localized understanding of the needs and concerns of ethnoracially minoritized communities [204]. First, PHAs (e.g., WHO, UNICEF, USAID) partner with FBOs (e.g., Religions For Peace, World Faiths Development Dialogue, Catholic Relief Services, World Vision, World Jewish Congress) to deliver interfaith learning to empower faith leaders to network and become ambassadors to their own communities [45, 91, 146, 189]; faith leaders were recruited to advisory councils which lead to stronger commitments to participate in vaccine promotion digitally [79, 122, 142] and in-person [97, 171]. Second, PHA-FBO partners co-created vaccine awareness and educational materials and campaigns like "the Color Green Vaccination" [188], "Build Hope Together" [88] with careful consideration to religious beliefs and local practices, thereby contributing to minoritized communities' acceptance and understanding of vaccines. Finally, improving equitable vaccine access is one of the many priorities of FBOs that PHAs have leveraged to create longstanding impacts to address the needs of communities made structurally vulnerable such as ethnoracially minoritized groups [205, 206]. Leveraging FBOs' shared commitment in providing humanitarian aid [55], wrap-around services [162], and social supports [111] to marginalized communities in both LMICs [16] and HICs [207] was seen as instrumental to the success of these partnerships.

Among initiatives that reported frameworks, models, and strategies, PHAs did not explicitly consider the socio-structural drivers of racial and health inequities. Rather, they took on community-centered implementation approaches (e.g., CBPR [44–48]; CEO [49, 50], Social Mobilization Implementation Theory [52, 53], Community Engagement Framework [56], Locally-Driven Partnerships and Community-designed Solutions [64] etc.). Local faith-based partners' understanding of cultural and social norms and contextual needs, and as established and trusted leaders within their respective communities positively informed vaccine outreach activities. A few applied vaccine hesitancy models/frameworks (e.g., The 5C psychological antecedents of vaccination [70], Behavioral and Social Drivers of Vaccination Framework [55], Vaccine hesitancy Determinants and Matrix of Vaccine Hesitancy [72]). Very few explicitly centered equity, applied intersectional approaches when analyzing relationships between FBOs and PHAs (e.g., CFIR [43, 54], Health Interfaith CBO COVID-19 prevention model [62], etc.) or problematized the socio-structural influences of minoritization impacting different ethno-racial groups (i.e. Taskforce on Racial Inclusion and Equity framework [68]).

Our study has answered the call for evidence-informed approaches, in collaboration with faith-based communities that narrow vaccine delivery equity gaps among ethnoracially minoritized communities [23]. The review addresses a knowledge gap on the use of faith-based partnerships to improve equitable vaccine distribution among various low vaccine uptake communities, including zero-dose children [208, 209], migrant populations [183], newcomers and refugees [210], and rural communities [211]. FBOs provided PHAs the tools (i.e., faith-based frameworks) to engage and network with communities in rural, remote, or conflict-ridden regions of the world where CBOs and PHAs previously had difficulty accessing vaccines, demonstrating FBOs' potential impact on equitable vaccine delivery [187, 212].

Despite these contributions, our scoping review highlights limitations in the ways that FBOs' contributions are not well-documented. The findings of this scoping review, echoing others [213], point to a critical need to further evaluate the impact of initiatives.



## Limitations

We note a few limitations for the scoping review. First, the study only included interventions reported in English. Second, in keeping with scoping review methodology, we did not assess the effectiveness of strategies for reaching ethnoracially minoritized population groups who are historically made vulnerable by oppressive structures (e.g., different strategies that worked for Indigenous Peoples, refugees in conflict zones). Third, this paper may be subject to some publication bias given the inclusion of media reports and organizational reports that primarily showcase the positive impacts of PHA-FBO partnerships on vaccine confidence and uptake. Further research is needed into the utility of standardized performance indicators to avoid positively skewed outcomes among PHA-FBO partnerships whose reporting may be influenced by the need to secure continued funding for sponsors.

## Conclusion

PHA-FBO vaccine initiatives improved vaccine uptake among faith-based communities and ethnoracially minoritized populations who are made structurally vulnerable due to racism, statelessness, stigmatization, oppression and/or marginalization. Collaborations between PHA-FBO and other partners promoted vaccine confidence and access by interfaith learning and training, awareness and education with faith-based sensitivities, and wrap-around services to increase accessibility based on principles of equity. Future research on the impacts of faith-based initiatives can be strengthened using theories/conceptual frameworks that help to interrogate and analyze the historical and sociopolitical processes of minoritization, complemented by implementation science methods to assess the processes and outcomes of implementing interventions and their health equity impacts.

## Supporting information

### **S1 File. Inclusion and exclusion criteria.**

(DOCX)

### **S2 File. Scoping review search strategy and outcome.**

(DOCX)

### **S3 File. Document extraction codebook.**

(DOCX)

### **S4 File. Religions and languages of vaccine initiatives.**

(DOCX)

### **S5 File. Public health partners, faith-based organization partners, and other partners.**

(DOCX)

### **S6 File. Lead partners and vaccine delivery personnel.**

(DOCX)

## Acknowledgments

The authors would like to thank the Canadian Institutes of Health Research (CIHR) for funding the research. We would like to thank research assistants Tanvii Sharma and Dhra Choudry for their support on data extraction, Subrana Rahman for support with revisions, and Kadidia-tou Kadio for feedback on the manuscript.

## Author Contributions

**Conceptualization:** Shaza A. Fadel, Sara Allin, Anushka Ataullahjan, Erica Di Ruggiero.

**Formal analysis:** Melodie Yunju Song, Denessia Blake-Hepburn, Anna Karbasi.

**Funding acquisition:** Shaza A. Fadel, Sara Allin, Anushka Ataullahjan, Erica Di Ruggiero.

**Investigation:** Melodie Yunju Song, Denessia Blake-Hepburn.

**Methodology:** Melodie Yunju Song, Denessia Blake-Hepburn, Anna Karbasi, Shaza A. Fadel, Sara Allin, Anushka Ataullahjan, Erica Di Ruggiero.

**Supervision:** Shaza A. Fadel, Sara Allin, Anushka Ataullahjan, Erica Di Ruggiero.

**Visualization:** Melodie Yunju Song.

**Writing – original draft:** Melodie Yunju Song, Denessia Blake-Hepburn, Anna Karbasi.

**Writing – review & editing:** Melodie Yunju Song, Denessia Blake-Hepburn, Shaza A. Fadel, Sara Allin, Anushka Ataullahjan, Erica Di Ruggiero.

## References

1. World Health Organization. Ten health issues WHO will tackle this year [Internet]. World Health Organization. 2019 [cited 2022 Feb 17]. <https://www.who.int/news-room/spotlight/ten-threats-to-global-health-in-2019>
2. Bussink-Voorend D, Hautvast JLA, Vandeberg L, Visser O, Hulscher MEJL. A systematic literature review to clarify the concept of vaccine hesitancy. *Nat Hum Behav*. 2022 Aug 22;1–15.
3. MacDonald NE, the SAGE Working Group on Vaccine Hesitancy. Vaccine hesitancy: Definition, scope and determinants. *Vaccine*. 2015 Aug 14; 33(34):4161–4. <https://doi.org/10.1016/j.vaccine.2015.04.036> PMID: 25896383
4. OHCHR. About minorities and human rights [Internet]. United Nations Human Rights of the Office Commissioner. [cited 2023 Jun 29]. <https://www.ohchr.org/en/special-procedures/sr-minority-issues/about-minorities-and-human-rights>
5. Razai MS, Osama T, McKechnie DGJ, Majeed A. Covid-19 vaccine hesitancy among ethnic minority groups. *BMJ*. 2021 Feb 26; 372:513. <https://doi.org/10.1136/bmj.n513> PMID: 33637577
6. Williams DR, Lawrence JA, Davis BA. Racism and Health: Evidence and Needed Research. *Annu Rev Public Health*. 2019 Apr 1; 40:105–25. <https://doi.org/10.1146/annurev-publhealth-040218-043750> PMID: 30601726
7. Chowdhury N, Turin TC. Pre-existing health inequalities in vaccine uptake were exacerbated among ethnic communities during COVID-19 pandemic. *Evid Based Nurs [Internet]*. 2022 Aug 11 [cited 2022 Dec 2]; <https://ebn.bmj.com/content/early/2022/10/04/ebnurs-2022-103565>
8. Bajaj SS, Stanford FC. Beyond Tuskegee—Vaccine Distrust and Everyday Racism. *N Engl J Med*. 2021 Feb 4; 384(5):e12. <https://doi.org/10.1056/NEJMpv2035827> PMID: 33471971
9. Eissa A, Lofters A, Akor N, Prescod C, Nnorom O. Increasing SARS-CoV-2 vaccination rates among Black people in Canada. *CMAJ*. 2021 Aug 9; 193(31):E1220–1. <https://doi.org/10.1503/cmaj.210949> PMID: 34373272
10. Hostetter M, Klein S. Understanding and Ameliorating Medical Mistrust Among Black Americans [Internet]. 2021 [cited 2023 Jan 9]. <https://www.commonwealthfund.org/publications/newsletter-article/2021/jan/medical-mistrust-among-black-americans>
11. Milner A, Jumbe S. Using the right words to address racial disparities in COVID-19. *Lancet Public Health*. 2020 Aug 1; 5(8):e419–20. [https://doi.org/10.1016/S2468-2667\(20\)30162-6](https://doi.org/10.1016/S2468-2667(20)30162-6) PMID: 32707127
12. U.S Department for Health and Human Services. Attachment A -Public Health Authority and Surveillance Activities [Internet]. U.S Department for Health and Human Services. 2020 [cited 2023 Dec 7]. <https://www.hhs.gov/ohrp/sachrp-committee/recommendations/attachment-public-health-authority-and-surveillance-activities/index.html>
13. Bielefeld W, Cleveland WS. Defining faith-based organizations and understanding them through research. *Nonprofit Volunt Sect Q*. 2013; 42(3):442–67.
14. Emory University, Interfaith Health Program. Public Health and Faith Community Partners: Model Practices to Increase Influenza Prevention Among Vulnerable Populations. A resource guide and

- toolkit for public health agencies [Internet]. 2014 [cited 2022 Mar 22]. <https://www.chausa.org/docs/default-source/community-benefit/emory-university-interfaith-health-program.pdf?sfvrsn=0>
15. de Figueiredo A, Simas C, Karafillakis E, Paterson P, Larson HJ. Mapping global trends in vaccine confidence and investigating barriers to vaccine uptake: a large-scale retrospective temporal modeling study. *The Lancet*. 2020 Sep 26; 396(10255):898–908. [https://doi.org/10.1016/S0140-6736\(20\)31558-0](https://doi.org/10.1016/S0140-6736(20)31558-0) PMID: 32919524
  16. Melillo S, Strachan R, O'Brien CJ, Wonodi C, Bormet M, Fountain D. Effects of Local Faith-Actor Engagement in the Uptake and Coverage of Immunization in Low- and Middle-Income Countries: A Literature Review. *Christ J Glob Health*. 2022 Jun 20; 9(1):2–32.
  17. Olivier J. Interventions with local faith communities on immunization in development contexts. *Rev Faith Int Aff*. 2016; 14(3):36–50.
  18. Olivier J. Scoping Review: Local faith communities and immunization for community and health systems strengthening [Internet]. The Joint Learning Initiative on Faith and Local Communities; 2014 [cited 2022 Feb 7] p. 103. Available from: <https://jilflc.com/wp-content/uploads/2014/09/LOCAL-FAITH-COMMUNITIES-AND-IMMUNIZATION-FOR-COMMUNITY-AND-HEALTH-SYSTEMS.pdf>
  19. Melillo S, Fountain D, Bormet M, O'Brien C. Promising Practices for Engaging Local Faith Actors to Promote COVID-19 Vaccination: Lessons Learned from Four Countries: Ghana, Indonesia, Sierra Leone, and Uganda [Internet]. USAID MOMENTUM Country and Global Leadership; 2021. Available from: <https://jilflc.com/wp-content/uploads/2022/05/MCGL-Report-Promising-Practices-for-Engaging-Local-Faith-Actors-to-Promote-COVID-19-Vaccination-in-Ghana-Indonesia-Sierra-Leone-Uganda-1.pdf>
  20. Tembo L. Tackling COVID-19 vaccine misinformation through Faith Leaders [Internet]. 2022 [cited 2022 Oct 25]. <https://www.unicef.org/malawi/stories/tackling-covid-19-vaccine-misinformation-through-faith-leaders>
  21. Khan KB, Singh D, Hess S. COVID-19 vaccine communications webinar series: Co-convened by the World Health Organization, UNICEF and Religions for Peace, Part 1 [Internet]. 2021 May 20 [cited 2022 Jun 22]. <https://www.who.int/news-room/events/detail/2021/05/20/default-calendar/covid-19-vaccine-ommunications-webinar-series-co-convened-by-the-world-health-organization-unicef-and-religions-for-peace>
  22. Marshall K. Faith in Vaccines [Internet]. GAVI The Vaccine Alliance. 2015 [cited 2022 Mar 22]. <https://www.gavi.org/faith-in-vaccines>
  23. Koh HK, Coles E. Body and Soul: Health Collaborations With Faith-Based Organizations. *Am J Public Health*. 2019 Mar; 109(3):369–70. <https://doi.org/10.2105/AJPH.2018.304920> PMID: 30726136
  24. Brewer LC, Williams DR. We've come this far by faith: the role of the Black church in public health. *Am J Public Health*. 2019; 109(3):385. <https://doi.org/10.2105/AJPH.2018.304939> PMID: 30726121
  25. Levin J. Faith-Based Partnerships for Population Health: Challenges, Initiatives, and Prospects. *Public Health Rep*. 2014 Mar 1; 129(2):127–31. <https://doi.org/10.1177/003335491412900205> PMID: 24587546
  26. Emory University Interfaith Health Program. Faith-Based and Public Health Partnerships: Reaching Vulnerable Populations [Internet]. 2016 [cited 2022 Mar 22] p. 2. <https://ihpemory.org/wp-content/uploads/2017/05/Emory-ASTHO-CDC-Report-2016.pdf>
  27. User Guide for Faith-Based Leaders Toolkit [Internet]. 2021 [cited 2022 Mar 22]. [https://wecandothishhs.gov/sites/default/files/2021-06/FBO%20Full%20Toolkit\\_English%2006.11.2021.pdf](https://wecandothishhs.gov/sites/default/files/2021-06/FBO%20Full%20Toolkit_English%2006.11.2021.pdf)
  28. CDC. COVID-19 Vaccination Field Guide: 12 Strategies for Your Community [Internet]. 2021 [cited 2022 Feb 7]. [https://www.ccbh.net/wp-content/uploads/2021/09/Field-Guide\\_CDC\\_Final\\_2021.pdf](https://www.ccbh.net/wp-content/uploads/2021/09/Field-Guide_CDC_Final_2021.pdf)
  29. Kiser M. Public Health Reaching out to the Faith Community: Why, How, and What Works | <https://ihpemory.org> [Internet]. 2016 Apr 4 [cited 2023 Jul 12]. <https://ihpemory.org/public-health-reaching-out-to-the-faith-community-why-how-and-what-works/>
  30. Kiser M, Lovelace K. A National Network of Public Health and Faith-Based Organizations to Increase Influenza Prevention Among Hard-to-Reach Populations. *Am J Public Health*. 2019 Mar; 109(3):371–7. <https://doi.org/10.2105/AJPH.2018.304826> PMID: 30676795
  31. Santibañez S, Ottewell A, Harper-Hardy P, Ryan E, Christensen H, Smith N. A Rapid Survey of State and Territorial Public Health Partnerships With Faith-Based Organizations to Promote COVID-19 Vaccination. *Am J Public Health*. 2022 Mar; 112(3):397–400. <https://doi.org/10.2105/AJPH.2021.306620> PMID: 35196042
  32. Novak J, Sopory P. Engaging with and Training Community-based Partners for Public Health Emergencies: Qualitative Research Evidence Synthesis [Internet]. National Academies of Sciences, Engineering, and Medicine, Committee on Evidence-Based Practices for Public Health Emergency Preparedness and Response; 2020 Feb. <https://www.nationalacademies.org/documents/embed/link/LF2255DA3DD1C41C0A42D3BEF0989ACAECE3053A6A9B/file/DB875D705D9C8F3138177D9F34BAD0BAC7B6E4203677?noSaveAs=1>

33. Syed U, Kapera O, Chandrasekhar A, Baylor BT, Hassan A, Magalhães M, et al. The Role of Faith-Based Organizations in Improving Vaccination Confidence & Addressing Vaccination Disparities to Help Improve Vaccine Uptake: A Systematic Review. *Vaccines*. 2023 Feb; 11(2):449.
34. Nilsen P. Making sense of implementation theories, models and frameworks. *Implement Sci*. 2020; 10(1):53.
35. Peters MDJ, Godfrey CM, Khalil H, McInerney P, Parker D, Soares CB. Guidance for conducting systematic scoping reviews. *Int J Evid Based Healthc*. 2015 Sep; 13(3):141–6. <https://doi.org/10.1097/XEB.000000000000050> PMID: 26134548
36. Aromataris E, Lockwood C, Porritt K, Pilla B, Jordan Z. Why a scoping review?—JBI Manual for Evidence Synthesis [Internet]. JBI. 2022 [cited 2023 May 24]. <https://jbi-global-wiki.refined.site/space/MANUAL/4687794>
37. Song MY, Blake-Hepburn D, Fadel S, Allin S, Ataullahjan A, Di Ruggiero E. Faith-based organisations and their role in supporting vaccine confidence and uptake: a scoping review protocol. *BMJ Open*. 2023 Dec 21; 13(12):e070843. <https://doi.org/10.1136/bmjopen-2022-070843> PMID: 38135322
38. The Joanna Briggs Institute. Joanna Briggs Institute Reviewers' Manual: 2015 edition / Supplement [Internet]. The Joanna Briggs Institute; 2015 [cited 2022 Jul 11]. <https://nursing.lsuhscc.edu/JBI/docs/ReviewersManuals/Scoping-.pdf>
39. COVIDENCE. Covidence systematic review software [Internet]. Melbourne, Australia: Veritas Health Innovation; 2022 [cited 2022 Jul 11]. <https://www.covidence.org/>
40. Tricco AC, Lillie E, Zarin W, O'Brien KK, Colquhoun H, Levac D, et al. PRISMA Extension for Scoping Reviews (PRISMA-ScR): Checklist and Explanation. *Ann Intern Med*. 2018; 169(7):467–73. <https://doi.org/10.7326/M18-0850> PMID: 30178033
41. Bayih G, Teklu A, Mekonnen ZA, Zelalem M, Tsedaw T, Tefera S, et al. The Implementation of Social and Behavior Change Communication Intervention to Improve Immunization Demand: A qualitative study in Awabel District, Northwest Ethiopia. *Ethiop J Health Dev*. 2021; 35(3):49–55.
42. Limaye RJ, Sara AB, Siddique AR, Vivas C, Malik S, Omonoku J. Interpersonal and community influences affecting childhood vaccination decision-making among Nigerian caregivers: Perceptions among frontline workers in Nigeria. *J Child Health Care*. 2019; 23(3):403–14. <https://doi.org/10.1177/1367493519852457> PMID: 31122059
43. Owoaje E., Rahimi AO., Kalbarczyk A., Akinyemi O., Peters MA., Alonge OO. Conflict, community, and collaboration: shared implementation barriers and strategies in two polio endemic countries. *BMC Public Health*. 2020; 20(Suppl 4):1178. <https://doi.org/10.1186/s12889-020-09235-x> PMID: 33339525
44. Vincenzo JL, Spear MJ, Moore R, Purvis RS, Patton SK, Callaghan-Koru J, et al. Reaching late adopters: factors influencing COVID-19 vaccination of Marshallese and Hispanic adults. *BMC Public Health*. 2023 Apr 3; 23(1):631. <https://doi.org/10.1186/s12889-023-15468-3> PMID: 37013523
45. Banerjee P, Seth R, Dhaliwal BK, Sullivan A, Qiayum Y, Thankachen B, et al. Vaccine acceptance in rural India: Engaging faith leaders as vaccine ambassadors. *Front Public Health*. 2022 Sep 20; 10:979424. <https://doi.org/10.3389/fpubh.2022.979424> PMID: 36203681
46. Ma GX, Minsun M Lee, Yin Tan, Hanlon AL, Ziding Feng, Shireman TI, et al. Efficacy of a community-based participatory and multilevel intervention to enhance hepatitis B virus screening and vaccination in underserved Korean Americans. *Cancer*. 2018; 124(5):973–82. <https://doi.org/10.1002/cncr.31134> PMID: 29131316
47. Purvis RS, Vincenzo JL, Spear M, Moore R, Patton SK, Callaghan-Koru J, et al. Factors Associated With Marshallese and Hispanic Adults' Willingness to Receive a COVID-19 Booster Dose. *J Prim Care Community Health*. 2023 May 16; 14:21501319231171440. <https://doi.org/10.1177/21501319231171440> PMID: 37191303
48. Bond KT, Jones K, Ompad DC, Vlahov D. Resources and Interest Among Faith Based Organizations for Influenza Vaccination Programs. *J Immigr Minor Health* [Internet]. 2013 Aug 1 [cited 2022 Feb 4]; 15(4):758–63. Available from: <https://doi.org/10.1007/s10903-012-9645-z> PMID: 22623183
49. Nevada Vaccine Equity Collaborative [Internet]. 2021 [cited 2022 Apr 7]. [https://www.immunizenevada.org/sites/default/files/2021-06/IN\\_210374%20VEC%20Toolkit\\_F\\_May%202021.pdf](https://www.immunizenevada.org/sites/default/files/2021-06/IN_210374%20VEC%20Toolkit_F_May%202021.pdf)
50. Privor-Dumm L, King T. Community-based Strategies to Engage Pastors Can Help Address Vaccine Hesitancy and Health Disparities in Black Communities. *J Health Commun*. 2020 Oct 2; 25(10):827–30. <https://doi.org/10.1080/10810730.2021.1873463> PMID: 33719889
51. Lahijani AY., King AR., Gullatte MM., Hennink M., Bednarczyk RA. HPV Vaccine Promotion: The church as an agent of change. *Soc Sci Med* 1982. 2021; 268:113375.
52. Malik MN, Awan MS, Saleem T. Social mobilization campaign to tackle immunization hesitancy in Sargodha and Khushab districts of Pakistan. *J Glob Health*. 2020; 10(2):021302. <https://doi.org/10.7189/jogh.10.021302> PMID: 33312516

53. Bedford J, Chitnis K, Webber N, Dixon P, Limwame K, Elessawi R, et al. Community Engagement in Liberia: Routine Immunization Post-Ebola. *J Health Commun.* 2017 Aug 30; 22(sup1):81–90. <https://doi.org/10.1080/10810730.2016.1253122> PMID: 28854140
54. Tjilos M, Tamlyn AL, Ragan EJ, Assoumou SA, Barnett KG, Martin P, et al. “Community members have more impact on their neighbors than celebrities”: leveraging community partnerships to build COVID-19 vaccine confidence. *BMC Public Health.* 2023 Feb 16; 23(1):350. <https://doi.org/10.1186/s12889-023-15198-6> PMID: 36797724
55. MOMENTUM. Promoting Vaccination: A Toolkit for Collaborating with Faith Communities [Internet]. USAID MOMENTUM. 2023 [cited 2023 Oct 17]. <https://usaidmomentum.org/resource/promoting-vaccination-a-toolkit-for-collaborating-with-faith-communities/>
56. Ignacio M, Oesterle S, Mercado M, Carver A, Lopez G, Wolfersteig W, et al. Narratives from African American/Black, American Indian/Alaska Native, and Hispanic/Latinx community members in Arizona to enhance COVID-19 vaccine and vaccination uptake. *J Behav Med.* 2023 Apr 1; 46(1):140–52. <https://doi.org/10.1007/s10865-022-00300-x> PMID: 35322313
57. Patel E, Giess ME, Raushenbush PB. Interfaith “vaccine ambassadors” take up Biden’s Month of Action. *Religion News Service* [Internet]. 2021 Jun 3 [cited 2022 Jun 8]; <https://religionnews.com/2021/06/03/interfaith-vaccine-ambassadors-take-up-bidens-month-of-action/>
58. Micek K, Hester KA, Chanda C, Darwar R, Dounebaine B, Ellis AS, et al. Critical success factors for routine immunization performance: A case study of Zambia 2000 to 2018. *Vaccine X.* 2022 Aug 1; 11:100166. <https://doi.org/10.1016/j.jvacx.2022.100166> PMID: 35707220
59. Thompkins F, Goldblum P, Lai T, Reynolds J, Lachter R, Mhatre PG, et al. Using Cross-Cultural Collaboration to Establish a Working Coalition for An Equitable COVID-19 Vaccine Program. *J Humanist Psychol.* 2023 Feb 16;00221678221140625.
60. Assoumou SA, Peterson A, Ginman E, James T, Pierre CM, Hamilton S, et al. Addressing Inequities in SARS-CoV-2 Vaccine Uptake: The Boston Medical Center Health System Experience. *Ann Intern Med.* 2022 Jun 21; 175(6):879–84. <https://doi.org/10.7326/M22-0028> PMID: 35576586
61. Cates JR, Ortiz R, Shafer A, Romocki LS, Coyne-Beasley T. Designing Messages to Motivate Parents To Get Their Preteenage Sons Vaccinated Against Human Papillomavirus. *Perspect Sex Reprod Health.* 2012 Feb 9; 44(1):39–47. <https://doi.org/10.1363/4403912> PMID: 22405151
62. Wijesinghe MSD, Ariyaratne VS, Gunawardana BMI, Rajapaksha RMNU, Weerasinghe WMPC, Gomez P, et al. Role of Religious Leaders in COVID-19 Prevention: A Community-Level Prevention Model in Sri Lanka. *J Relig Health.* 2022; 61(1):687–702. <https://doi.org/10.1007/s10943-021-01463-8> PMID: 34812996
63. Kaduru CC, Mbagwu GC, Aadum DK, Eshikhenka G, Idim GA, Ibe UF, et al. Using community theater to improve demand for vaccination services in the Niger Delta Region of Nigeria. *BMC Proc.* 2023 Jul 3; 17(Suppl 7):6. <https://doi.org/10.1186/s12919-023-00263-0> PMID: 37400839
64. CDC. Partnering for Vaccine Equity: Stories from the Field| CDC [Internet]. 2023 [cited 2023 Oct 19]. <https://www.cdc.gov/vaccines/health-equity/field-stories.html>
65. Soni GK, Bhatnagar A, Gupta A, Kumari A, Arora S, Seth S, et al. Engaging Faith-Based Organizations for Promoting the Uptake of COVID-19 Vaccine in India: A Case Study of a Multi-Faith Society. *Vaccines.* 2023 Apr 13; 11(4):837. <https://doi.org/10.3390/vaccines11040837> PMID: 37112749
66. Chu J, Pink SL, Willer R. Religious identity cues increase vaccination intentions and trust in medical experts among American Christians. *Proc Natl Acad Sci.* 2021 Dec 7; 118(49):e2106481118. <https://doi.org/10.1073/pnas.2106481118> PMID: 34795017
67. Bellatin A, Hyder A, Rao S, Zhang PC, McGahan AM. Overcoming vaccine deployment challenges among the hardest to reach: lessons from polio elimination in India. *BMJ Glob Health.* 2021 Apr; 6(4):e005125. <https://doi.org/10.1136/bmjgh-2021-005125> PMID: 33906848
68. Ige O, Watkins J, Pham-Singer H, Dresser M, Maru D, Morse M. Embedding Health Equity in a Public Health Emergency Response: New York City’s Covid-19 Vaccination Experience. *NEJM Catal* [Internet]. 2023 Apr 28 [cited 2023 Oct 17]; 4(2). Available from: <https://catalyst.nejm.org/doi/full/10.1056/CAT.22.0425>
69. Asare M, Agyei-Baffour P, Koranteng A, Commeh ME, Fosu ES, Elizondo A, et al. Assessing the Efficacy of the 3R (Reframe, Reprioritize, and Reform) Communication Model to Increase HPV Vaccinations Acceptance in Ghana: Community-Based Intervention. *Vaccines.* 2023 May; 11(5):890. <https://doi.org/10.3390/vaccines11050890> PMID: 37242995
70. Hester KA, Sakas Z, Ogutu EA, Dixit S, Ellis AS, Yang C, et al. Critical interventions for demand generation in Zambia, Nepal, and Senegal with regards to the 5C psychological antecedents of vaccination. *Vaccine X.* 2023 Aug 1; 14:100341. <https://doi.org/10.1016/j.jvacx.2023.100341> PMID: 37519776

71. Coates EA, Waisbord S, Awale J, Solomon R, Dey R. Successful polio eradication in Uttar Pradesh, India: the pivotal contribution of the Social Mobilization Network, an NGO/UNICEF collaboration. *Glob Health Sci Pract*. 2013; 1(1):68–83. <https://doi.org/10.9745/GHSP-D-12-00018> PMID: 25276518
72. Majee W., Anakwe A., Onyeaka K., Harvey IS. The Past Is so Present: Understanding COVID-19 Vaccine Hesitancy Among African American Adults Using Qualitative Data. *J Racial Ethn Health Disparities*. 2023; 10(1):462–74.
73. Aylward B, Tangermann R. The global polio eradication initiative: lessons learned and prospects for success. *Vaccine*. 2011; 29(Suppl 4):D80–5. <https://doi.org/10.1016/j.vaccine.2011.10.005> PMID: 22486981
74. Rogers M, Vick H, Dietch S, Washington KL, Downer GA. The Impact of Federal, Faith and Community Partnership on the Frontlines of COVID-19 Vaccine Distribution | FEMA.gov [Internet]. 2021 Jul 28. <https://www.fema.gov/event/impact-federal-faith-and-community-partnership-frontlines-covid-19-vaccine-distribution>
75. Kader F, Kruchten S, Campo M, Collica-Cox K, Davidson C, Wald A, et al. Dialogic Health Education to Reduce COVID-19 Disparities and Increase Health Literacy in Community and Correctional Settings: Protocol for a Two-Pronged Health Education Program. *JMIR Res Protoc*. 2022 Oct 21; 11(10): e37713. <https://doi.org/10.2196/37713> PMID: 36194870
76. Hedlin C. Pittsburgh's Black churches dispel COVID myths, improve vaccine access. PublicSource [Internet]. 2021 Mar 18 [cited 2022 Mar 22]; <http://www.publicsource.org/pittsburgh-black-churches-improve-access-to-covid-19-vaccine/>
77. Oku A, Oyo-lta A, Glenton C, Fretheim A, Eteng G, Ames H, et al. Factors affecting the implementation of childhood vaccination communication strategies in Nigeria: a qualitative study. *BMC Public Health*. 2017; 17(1):200. <https://doi.org/10.1186/s12889-017-4020-6> PMID: 28202001
78. Salguero GA, Hauer M. COVID-19 Vaccines and the Faith Community [Internet]. Council on Foreign Relations. 2021. Available from: <https://www.cfr.org/event/covid-19-vaccines-and-faith-community>
79. Walker JA, Hashim Y, Oranye N. Impact of Muslim opinion leaders' training of healthcare providers on the uptake of MNCH services in Northern Nigeria. *Glob Public Health*. 2019; 14(2):200–13. <https://doi.org/10.1080/17441692.2018.1473889> PMID: 29764294
80. Soni GK, Seth S, Arora S, Singh K, Kumari A, Kanagat N, et al. Harnessing the Power of Collaboration to Expand the Coverage and Equity of COVID-19 Vaccinations in India: A Community Collaboration Model. *Vaccines*. 2023 Jun; 11(6):1022. <https://doi.org/10.3390/vaccines11061022> PMID: 37376411
81. Murphy E. Social Mobilization: Lessons from the CORE Group Polio Project in Angola, Ethiopia, and India [Internet]. USAID, The CORE Group; 2012 Sep [cited 2022 Apr 11]. [https://coregroup.org/wp-content/uploads/media-backup/Polio\\_Initiative/smreport-online.pdf](https://coregroup.org/wp-content/uploads/media-backup/Polio_Initiative/smreport-online.pdf)
82. Posy A, Mohamed S, Babington-Johnson A. Engaging Faith Leaders in Improving Vaccine Confidence Webinar [Internet]. Engaging Faith Leaders in Improving Vaccine Confidence Webinar; 2021 Apr 7 [cited 2022 Mar 29]; Online. <https://www.immunizationmanagers.org/resources/vaccine-confidence-toolkit-webinar-series-webinar-4/>
83. Webinar: "Covid-19 vaccination: how churches can ensure that stateless people are not left behind" [Internet]. 2021 [cited 2022 Jun 22]. <https://www.youtube.com/watch?v=qR05pIKFckQ>
84. World Council of Churches. Invitation to reflection and engagement on ethical issues related to COVID-19 vaccine distribution [Internet]. 2020 [cited 2022 Mar 26]. <https://www.oikoumene.org/resources/documents/invitation-to-reflection-and-engagement-on-ethical-issues-related-to-covid-19-vaccine-distribution>
85. World Council of Churches. Webinar focuses on role of religious leaders in overcoming barriers to COVID-19 vaccines [Internet]. 2021 [cited 2022 Mar 22]. <https://www.oikoumene.org/news/webinar-focuses-on-role-of-religious-leaders-in-overcoming-barriers-to-covid-19-vaccines>
86. Quezada M, Chu A. Bringing the Faith Community Together for Global Vaccine Equity [Internet]. UNICEF USA. 2021 [cited 2022 Mar 26]. Available from: <https://www.unicefusa.org/stories/bringing-faith-community-together-global-vaccine-equity/39098>
87. Shimron Y, Banks AM. Faith, medical leaders collaborate to get COVID-19 vaccine in arms of more people. Religion News Service [Internet]. 2021 Feb 18; Available from: <https://religionnews.com/2021/02/18/faith-medical-leaders-collaborate-to-get-covid-19-vaccine-in-arms-of-more-people/>
88. Part 1- The role & impact of faith actors in overcoming barriers to COVID-19 vaccination. [Internet]. 2021 [cited 2022 Jul 15]. <https://www.youtube.com/watch?v=IRtk6F8NLVA>
89. WHO/SEARO. Keeping People Safe: What Faith Leaders Can Do [Internet]. 2021 [cited 2022 Mar 26]. <https://www.who.int/southeastasia/outbreaks-and-emergencies/covid-19/What-can-we-do-to-keep-safe/protective-measures/message-for-faith-leaders>

90. Pan American Health Organization. Webinar: Faith-based actors as promoters of vaccination—PAHO/WHO | Pan American Health Organization [Internet]. 2022 [cited 2023 Oct 17]. <https://www.paho.org/en/events/webinar-faith-based-actors-promoters-vaccination>
91. Catholic Relief Services. Civil Society Organization Platforms Contribute to National Immunization Programs—PROMISING PRACTICES 2012–2018 [Internet]. Catholic Relief Services; 2019 [cited 2022 Apr 6]. [https://www.crs.org/sites/default/files/tools-research/promising\\_practices\\_a4\\_final\\_rev071119\\_online.pdf](https://www.crs.org/sites/default/files/tools-research/promising_practices_a4_final_rev071119_online.pdf)
92. WHO EU. Israel: Religious leaders bolster COVID-19 response with civil society and WHO/Europe support [Internet]. WHO. 2022 [cited 2022 Mar 26]. <https://www.euro.who.int/en/countries/israel/news/news/2022/01/israel-religious-leaders-bolster-covid-19-response-with-civil-society-and-who-europe-support>
93. EPI-WIN Faith Engagement Webinars—YouTube [Internet]. 2021 [cited 2022 Mar 26]. <https://www.youtube.com/playlist?list=PLBcdAT384bQu6wo6twEdDsP27bRpBu5eG>
94. Desmon S. Engaging Religious Leaders to Boost COVID-19 Vaccination—Johns Hopkins Center for Communication Programs [Internet]. 2022 [cited 2023 Oct 17]. <https://ccp.jhu.edu/2022/05/02/religious-leaders-covid/>
95. Santibañez S, Davis M, Avchen RN. CDC Engagement With Community and Faith-Based Organizations in Public Health Emergencies. *Am J Public Health*. 2019 Sep; 109(Suppl 4):S274–6. <https://doi.org/10.2105/AJPH.2019.305275> PMID: 31505142
96. Aylward L. Faith & Immunization: Past, Present and Potential Roles of Faith-Inspired Organizations [Internet]. GAVI Alliance; 2012 May [cited 2022 Mar 25] p. 21. <https://berkeleycenter.georgetown.edu/publications/faith-immunization-past-present-and-potential-roles-of-faith-inspired-organizations>
97. Howley EK. Improving COVID-19 Vaccination Rates Through Partnerships with Faith-Based Organizations [Internet]. VaccineVoices. 2022 [cited 2023 Oct 17]. <https://www.vaccinevoices.org/resources/article/improving-covid-19-vaccination-rates-through-partnerships-faith-based-organizations>
98. Alliance for Healthier Communities. Community Vaccination Promotion—Ontario (CVP-ON) | Alliance for Healthier Communities [Internet]. Alliance for Healthier Communities. 2022 [cited 2022 Mar 29]. <https://www.allianceon.org/Community-Vaccination-Promotion-In-Ontario>
99. Commonwealth of Massachusetts. COVID-19 Vaccine Equity Initiative: Tailored community- and faith-based outreach and education | Mass.gov [Internet]. Mass.gov. 2021 [cited 2022 Mar 22]. <https://www.mass.gov/info-details/covid-19-vaccine-equity-initiative-tailored-community-and-faith-based-outreach-and-education>
100. Diallo F, Paulino L, Shiman LJ, Freeman K, Brooks B, Banson D, et al. Engaging businesses and faith-based organizations in public health interventions: Lessons learned from a COVID-19 and flu vaccine detailing program in the Northeast Bronx. *Public Health Pract Oxf Engl*. 2023 Jun; 5:100353. <https://doi.org/10.1016/j.puhip.2022.100353> PMID: 36532097
101. Kaufman J, Overmars I, Leask J, Seale H, Chisholm M, Hart J, et al. Vaccine Champions Training Program: Empowering Community Leaders to Advocate for COVID-19 Vaccines. *Vaccines*. 2022 Nov 9; 10(11):1893. <https://doi.org/10.3390/vaccines10111893> PMID: 36366401
102. City of Toronto. COVID-19: Vaccine Engagement Teams Updates [Internet]. City of Toronto. City of Toronto; 2023 [cited 2023 Oct 16]. <https://www.toronto.ca/community-people/health-wellness-care/health-programs-advice/respiratory-viruses/covid-19/covid-19-vaccines/covid-19-city-immunization-program/vaccine-engagement-teams-updates/>
103. Johns Hopkins University. Faith in the Vaccine Project [Internet]. John Hopkins Krieger School of Arts & Science, Program in Islamic Studies. 2021 [cited 2022 Jun 8]. <https://krieger.jhu.edu/islamic/community-connections/faith-in-the-vaccine/>
104. Association of American Medical Colleges. Building Trust and Confidence Through Partnerships Grant Program [Internet]. Center For Health Justice. 2023 [cited 2023 Oct 17]. <https://www.aamchealthjustice.org/our-work/trustworthiness/trust-grants>
105. Jones RP, Patel E. Religion to the rescue: How appeals to faith can inspire people to get COVID vaccination. *USA TODAY* [Internet]. 2021 Aug 18 [cited 2022 Feb 7]; <https://www.usatoday.com/story/opinion/2021/08/18/covid-and-religion-why-appeals-faith-can-increase-vaccinations/8120262002/>
106. Arkansas Department of Health. Faith-Based Outreach Arkansas Department of Health [Internet]. Arkansas Department of Health. 2021 [cited 2022 Mar 22]. <https://www.healthy.arkansas.gov/programs-services/topics/faith-based-outreach>
107. Singh H. How faith groups are supporting health and social care [Internet]. Religion Media Centre. 2023 [cited 2023 Oct 17]. <https://religionmediacentre.org.uk/news/how-faith-groups-are-supporting-health-and-social-care/>

108. Connecticut Department of Public Health. Faith-based collaboration provides outreach in multiple languages [Internet]. CIDRAP—Center for Infectious Disease Research and Policy. [cited 2022 Mar 22]. <https://www.cidrap.umn.edu/practice/faith-based-collaboration-provides-outreach-multiple-languages>
109. Evans A, Webster J., Flores G. Partnering With the Faith-Based Community to Address Disparities in COVID-19 Vaccination Rates and Outcomes Among US Black and Latino Populations. *JAMA*. 2021; 326(7):609–10. <https://doi.org/10.1001/jama.2021.12652> PMID: 34402817
110. Kaiser Permanente. Faith Leaders Use Trusted Voices to Encourage Vaccination [Internet]. 2021. <https://about.kaiserpermanente.org/community-health/news/faith-leaders-use-trusted-voices-to-encourage-vaccination>
111. Kasstan B, Mounier-Jack S, Letley L, Gaskell KM, Roberts CH, Stone NRH, et al. Localising vaccination services: Qualitative insights on public health and minority group collaborations to co-deliver coronavirus vaccines. *Vaccine*. 2022 Mar 25; 40(14):2226–32. <https://doi.org/10.1016/j.vaccine.2022.02.056> PMID: 35216844
112. Landon C, Maru A. Hepatitis B: Raising awareness in the South Asian community in Preston. *Br J Community Nurs*. 2013; 18(1):19–21. <https://doi.org/10.12968/bjcn.2013.18.1.19> PMID: 23299143
113. Progress report August–December 2012: Prime Minister’s Polio Monitoring & Coordination Cell. Islamabad, Prime Minister’s Secretariat [Internet]. 2012 [cited 2022 Apr 11]. <https://www.endpolio.com.pk/images/reports/polio-final-report.pdf>
114. Health Canada. Ask the experts COVID-19 vaccines questions: Safety, ingredients and side effects [Internet]. 2021 [cited 2022 Mar 22]. <https://www.canada.ca/en/health-canada/services/video/ask-experts-covid-19-vaccines.html>
115. Syed S, Wajid A. Muslim Community Engagement Efforts to Tackle COVID-19 Vaccine Misinformation. *Harvard Medical School Primary Care Review* [Internet]. 2021 Apr 16 [cited 2022 Mar 22]; <http://info.primarycare.hms.harvard.edu/review/muslim-community-engagement-efforts>
116. Alqazzaz K. Opinion | Community organizations play a critical role in getting vaccines to the most vulnerable. *The Hamilton Spectator* [Internet]. 2021 May 20 [cited 2022 Mar 22]; <https://www.thespec.com/opinion/contributors/2021/05/20/community-organizations-play-a-critical-role-in-getting-vaccines-to-the-most-vulnerable.html>
117. British Islamic Medical Association. COVID-19 Vaccine Hub | British Islamic Medical Association [Internet]. 2021 [cited 2022 Apr 7]. <https://britishima.org/operation-vaccination/hub/>
118. The British Board of Scholars and Imams. Top Ten Questions Imams & Scholars get asked about vaccines [Internet]. BBSI; 2020 [cited 2022 May 2]. <https://www.bdct.nhs.uk/wp-content/uploads/2021/01/BBSI-Vaccines-2020-11.1.21.pdf>
119. Bombino CL. These Evangelicals Are Equipping Church Leaders To Address COVID-19 Misinformation. *Religion Unplugged* [Internet]. 2022 Mar 21 [cited 2022 Mar 22]; Available from: <https://religionunplugged.com/news/2022/3/21/these-evangelicals-are-equipping-church-leaders-to-address-covid-19-misinformation>
120. Larry Ross Communications. Ad Council & COVID Collaborative Enlist Network of Evangelical Leaders & Healthcare Professionals to reach Evangelicals with Trusted Information [Internet]. A. Larry Ross Communications. 2021 [cited 2022 Mar 22]. <https://alarryross.com/christiansandvaccineblog/2021/4/13/ad-council-amp-covid-collaborative-enlist-network-of-evangelical-leaders-amp-healthcare-professionals-to-reach-evangelicals-with-trusted-information>
121. Yasmin S, Haque R, Kadambaya K, Maliha M, Sheikh M. Exploring How Public Health Partnerships with Community-Based Organizations (CBOs) can be Leveraged for Health Promotion and Community Health. *Inq J Health Care Organ Provis Financ*. 2022 Jan 1; 59:00469580221139372. <https://doi.org/10.1177/00469580221139372> PMID: 36448656
122. Project Last Mile. Digital and community influencers drive COVID-19 vaccine uptake in targeted South African populations. [Internet]. Project Last Mile. 2022 [cited 2023 Oct 17]. <https://www.projectlastmile.com/digital-and-community-influencers-drive-covid-19-vaccine-uptake-in-targeted-south-african-populations/>
123. Dascalu S, Flammer PG, Ghafari M, Henson SC, Nascimento R, Bonsall MB. Engaging Religious Institutions and Faith-Based Communities in Public Health Initiatives: A Case Study of the Romanian Orthodox Church During the COVID-19 Pandemic. *Front Public Health*. 2021; 9:768091. <https://doi.org/10.3389/fpubh.2021.768091> PMID: 34976927
124. Oyo-Ita A, Bosch-Capblanch X, Ross A, Oku A, Esu E, Ameh S, et al. Effects of engaging communities in decision-making and action through traditional and religious leaders on vaccination coverage in Cross River State, Nigeria: A cluster-randomised control trial. *PLoS ONE* [Internet]. 2021; 16(4 April). Available from: <https://www.scopus.com/inward/record.uri?eid=2-s2.0-85104244244&doi=10.1371%2fjournal.pone.0248236&partnerID=40&md5=3932aa7cc0defee4c527d34e5ded5846> PMID: 33861742



125. The Communication Initiative Network. Polio Communications Quarterly Update: Trust [Internet]. The Communication Initiative Network. 2013 [cited 2022 Apr 11]. <https://www.comminit.com/content/polio-communications-quarterly-update-trust>
126. Lee AJ. 5 Ways Churches Can Play a Critical Role in Vaccination Efforts [Internet]. Lewis Center for Church Leadership. 2021 [cited 2022 Mar 22]. <https://www.churchleadership.com/leading-ideas/5-ways-churches-can-play-a-critical-role-in-vaccination-efforts/>
127. National Institutes of Health. An Inter-Faith Alliance to Stop COVID-19 [Internet]. Community Engagement Alliance. 2022 [cited 2022 Apr 29]. <https://covid19community.nih.gov/An-Inter-Faith-Alliance-to-Stop-COVID-19>
128. Cox H, Gebru Y, Horter L, Palomeque FS, Myers K, Stowell D, et al. New York State, New York City, New Jersey, Puerto Rico, and the US Virgin Islands' Health Department Experiences Promoting Health Equity During the Initial COVID-19 Omicron Variant Period, 2021–2022. *Health Secur.* 2023 Sep; 21(S1):S25–34. <https://doi.org/10.1089/hs.2023.0001> PMID: 37590481
129. Hsiung S, Bhandari M, Pham J. Equity, Community and Trust: Building vaccine confidence with marginalized populations [Internet]. 2021 [cited 2022 Mar 29]. <https://www.childrenshealthcarecanada.ca/vaccination-conversations-poster-hall2/2022/1/19/equity-community-and-trust-building-vaccine-confidence-with-marginalized-populations>
130. Trageser C. How Churches Are Influencing Vaccine Decisions [Internet]. KPBS Public Media. 2021 [cited 2022 Mar 22]. <https://www.kpbs.org/news/faith-spirituality/2021/04/20/churches-influencing-vaccine-decisions>
131. Hoozer NV. Faith-Based Vaccine Outreach Underway to Reach Northern Nevada Latinos [Internet]. KUNR Public Radio. 2021 [cited 2022 Aug 5]. <https://www.kunr.org/public-health/2021-07-30/faith-based-vaccine-outreach-underway-to-reach-northern-nevada-latinos>
132. Ad Council. Hispanic Faith Community Toolkit—COVID-19 Vaccine Education Initiative [Internet]. Hispanic Faith Communities Toolkit. 2021. <https://hispanicfaithvaccinetoolkit.org/>
133. A Vaccination Webinar Collaboration [Internet]. 2021 [cited 2022 Apr 5]. <https://www.ekklisiae.org/blog/2021/7/1/a-vaccination-collaboration>
134. Health Commons Solutions Lab. Partnerships with faith-based communities to support vaccination An engagement toolkit [Internet]. 2022 [cited 2022 Mar 22]. [https://docs.google.com/presentation/d/1C0e03YawdGleNsEkyu4KyojWE41vB4d\\_nJUotpjEVGo](https://docs.google.com/presentation/d/1C0e03YawdGleNsEkyu4KyojWE41vB4d_nJUotpjEVGo)
135. National Center for Immunization and Respiratory Diseases, Department of Homeland Security. Cybersecurity and Infrastructure Security Agency. COVID-19 vaccine communication toolkit for community-based organizations: getting started [Internet]. CDC. 2021 [cited 2022 Mar 29]. <https://stacks.cdc.gov/view/cdc/100570>
136. Pennsylvania Office of Rural Health. Rural Pennsylvania COVID-19 Faith Toolkit [Internet]. [cited 2023 Nov 9]. <https://www.porh.psu.edu/wp-content/uploads/Rural-Pennsylvania-COVID-19-Faith-Toolkit.pdf>
137. UNICEF. Polio Communications Quarterly Update—June 2011 | La Iniciativa de Comunicación [Internet]. 2011 [cited 2022 Apr 11]. <https://www.comminit.com/la/content/polio-communications-quarterly-update-june-2011>
138. Lauro M. The Power of Religious Leaders to Drive COVID-19 Vaccine Demand Zanzibar [Internet]. Boost Community. 2022 [cited 2023 Oct 17]. <https://brightspots.boostcommunity.org/the-power-of-religious-leaders-to-drive-covid-19-vaccine-demand-zanzibar>
139. Hoffman J. Clergy Preach Faith in the Covid Vaccine to Doubters. *The New York Times* [Internet]. 2021 Mar 14 [cited 2022 Mar 22]; <https://www.nytimes.com/2021/03/14/health/clergy-covid-vaccine.html>
140. Schonfeld J. Faith and the COVID-19 Vaccine: “Using the Black Church to Get the Word Out” [Internet]. Interfaith America. 2021 [cited 2022 Jun 8]. <https://www.interfaithamerica.org/faith-and-the-covid-19-vaccine-using-the-black-church-to-get-the-word-out/>
141. The Vatican. Note on the morality of using some anti-Covid-19 vaccines (21 December 2020) [Internet]. 2020 [cited 2022 Mar 25]. [https://www.vatican.va/roman\\_curia/congregations/cfaith/documents/rc\\_con\\_cfaith\\_doc\\_20201221\\_nota-vaccini-anticovid\\_en.html](https://www.vatican.va/roman_curia/congregations/cfaith/documents/rc_con_cfaith_doc_20201221_nota-vaccini-anticovid_en.html)
142. Gopez JMW. Building public trust in COVID-19 vaccines through the Catholic Church in the Philippines. *J Public Health.* 2021 Feb 26; 43(2):e330–1. <https://doi.org/10.1093/pubmed/fdab036> PMID: 33640960
143. Northwest Catholic. School immunization policy updated to reflect Catholic teaching [Internet]. Northwest Catholic. 2019 [cited 2022 Mar 30]. <https://nwcatholic.org/news/northwest-catholic/school-immunization-policy-updated-to-reflect-catholic-teaching>
144. CBCP: Ethical and Scientific Issues of COVID-19 Vaccinations by Rev. Fr. Nicanor Austriaco, OP [Internet]. 2021 [cited 2022 Mar 24]. <https://www.youtube.com/watch?v=Xjmt0lIF1-0>

145. Boro E, Sapra T, de Lavison JF, Dalabona C, Ariyaratne V, Samsudin A. The Role and Impact of Faith-Based Organisations in the Management of and Response to COVID-19 in Low-Resource Settings: Policy & Practice Note. *Relig Dev*. 2022 Jun 16; 1(1):132–45.
146. WHO. Tanzania welcomes Ted Chaiban—United Republic of Tanzania | ReliefWeb [Internet]. 2022 [cited 2023 Oct 17]. <https://reliefweb.int/report/united-republic-tanzania/tanzania-welcomes-ted-chaiban>
147. Fazal A. Overcoming Covid Vaccine Hesitancy Among Minnesota's Somali Muslims [Internet]. The Hastings Center. 2022 [cited 2023 Oct 17]. <https://www.thehastingscenter.org/overcoming-covid-19-vaccine-hesitancy-among-minnesotas-somali-muslims/>
148. Al Jazeera. UK imams, influencers counter COVID vaccine misinformation [Internet]. 2021 [cited 2022 Apr 6]. <https://www.aljazeera.com/news/2021/1/22/uk-imams-mobilise-to-counter-covid-19-vaccine-disinformation>
149. Patwary MM. Faith leaders in the fight against the pandemic [Internet]. *BMJ Global Health blog*. 2023 [cited 2023 Oct 17]. <https://blogs.bmj.com/bmjgh/2023/03/07/faith-leaders-in-the-fight-against-the-pandemic/>
150. Marx GE, Burakoff A, Barnes M, Hite D, Metz A, Miller K, et al. Mumps outbreak in a Marshallese community—Denver metropolitan area, Colorado, 2016–2017. *Morb Mortal Wkly Rep*. 2018; 67(41):1143.
151. Rosen B, Waitzberg R, Israeli A, Hartal M, Davidovitch N. Addressing vaccine hesitancy and access barriers to achieve persistent progress in Israel's COVID-19 vaccination program. *Isr J Health Policy Res*. 2021 Aug 2; 10(1):43. <https://doi.org/10.1186/s13584-021-00481-x> PMID: 34340714
152. National Academies of Sciences, Engineering, and Medicine, Health and Medicine Division, Board on Global Health, Forum on Microbial Threats, Nicholson A, Minicucci C, et al. The Critical Public Health Value of Vaccines: Tackling Issues of Access and Hesitancy: Proceedings of a Workshop [Internet]. National Library of Medicine. 2021. <https://www.ncbi.nlm.nih.gov/books/NBK572621/>
153. Rocha ICN. Employing medical anthropology approach as an additional public health strategy in promoting COVID-19 vaccine acceptance in Bhutan. *Int J Health Plann Manage*. 2021; 36(5):1943–6. <https://doi.org/10.1002/hpm.3191> PMID: 33978261
154. Global Solidarity Fund. The Vaccines for All High-Level Roundtable: Seizing the Moment for Collaboration—Global Solidarity Fund [Internet]. Global Solidarity Fund. 2021 [cited 2022 Mar 22]. <https://www.globalsolidarityfund.org/the-vaccines-for-all-high-level-roundtable-seizing-the-moment-for-collaboration/>
155. Baillie KU. Engaging faith communities to reduce vaccination disparities [Internet]. *Penn Today*. 2021 [cited 2022 Mar 22]. <https://penntoday.upenn.edu/news/engaging-faith-communities-reduce-vaccination-disparities>
156. Scott N, Gabriel S, Sheppard V, Peacock A, Scott C, Flego K, et al. Responding to a measles outbreak in a Pacific island community in western Sydney: community interviews led to church-based immunization clinics. *West Pac Surveill Response J WPSAR*. 2015; 6(2):51–7.
157. Peterson P, McNabb P, Maddali SR, Heath J, Santibañez S. Engaging Communities to Reach Immigrant and Minority Populations: The Minnesota Immunization Networking Initiative (MINI), 2006–2017. *Public Health Rep*. 2019 May; 134(3):241–8. <https://doi.org/10.1177/0033354919834579> PMID: 30912998
158. Jenkins J. Vaccine hesitancy declines among faith groups, spurred partly by religious appeals. *The Salt Lake Tribune* [Internet]. 2021 Aug 1 <https://www.sltrib.com/religion/2021/07/28/vaccine-hesitancy/>
159. Immunize Nevada. Nevada Vaccine Equity Collaborative | Immunize Nevada [Internet]. 2021 [cited 2022 May 4]. <https://www.immunizenevada.org/nevada-vaccine-equity-collaborative>
160. Perry HB, Solomon R, Bisrat F, Hilmi L, Stamidis KV, Steinglass R, et al. Lessons Learned from the CORE Group Polio Project and Their Relevance for Other Global Health Priorities. *Am J Trop Med Hyg*. 2019 Oct; 101(4\_Suppl):107–12. <https://doi.org/10.4269/ajtmh.19-0036> PMID: 31760974
161. Riebe N. Edmonton coalition helps faith leaders preach the truth about COVID-19 vaccines | CBC News [Internet]. CBC. 2021 [cited 2023 Apr 17]. <https://www.cbc.ca/news/canada/edmonton/covid-19-ecrrc-1.6218905>
162. Ruijs WL, Hautvast JL, Kerrar S, van der Velden K, Hulscher ME. The role of religious leaders in promoting acceptance of vaccination within a minority group: a qualitative study. *BMC Public Health*. 2013 May 28; 13(1):511. <https://doi.org/10.1186/1471-2458-13-511> PMID: 23711160
163. Chan HK, Soelar SA, Md Ali SM, Ahmad F, Abu Hassan MR. Trends in Vaccination Refusal in Children Under 2 Years of Age in Kedah, Malaysia: A 4-Year Review From 2013 to 2016. *Asia Pac J Public Health*. 2018; 30(2):137–46. <https://doi.org/10.1177/1010539517751312> PMID: 29292654
164. Wesevich A, Chipungu J, Mwale M, Bosomprah S, Chilengi R. Health Promotion Through Existing Community Structures. *J Prim Care Community Health*. 2016 Apr; 7(2):81–7.

165. Minnesota Dept. of Health. Partnering with faith communities: Pillars of support during the COVID-19 response—COVID-19 Stories [Internet]. 2022 [cited 2022 Nov 17]. <https://www.health.state.mn.us/diseases/coronavirus/stories/faith.html>
166. Hospital Partners with Faith-based Group to Vaccinate Muslim Community [Internet]. 2021 [cited 2022 Mar 22]. <https://www.aha.org/advancing-health-podcast/2021-04-07-hospital-partners-faith-based-group-vaccinate-muslim-community>
167. National Association of Evangelicals. Will Evangelical Leaders Receive the COVID-19 Vaccine? [Internet]. National Association of Evangelicals. 2021 [cited 2022 Mar 31]. <https://www.nae.org/evangelical-leaders-covid-19-vaccine/>
168. Abdul Rahman MA, Al Dabbagh SA, Al Habeeb QS. Health education and peer leaders' role in improving low vaccination coverage in Akre district, Kurdistan region, Iraq. *East Mediterr Health J*. 2013 Feb 1; 19(02):125–9. PMID: [23516821](https://pubmed.ncbi.nlm.nih.gov/23516821/)
169. Laughlin J. Faith leaders heed the call to help get coronavirus vaccines to more Black Philadelphians. <https://www.inquirer.com> [Internet]. 2021 Feb 11 [cited 2022 Mar 22]; <https://www.inquirer.com/health/coronavirus/covid-vaccine-african-episcopal-church-philadelphia-20210211.html>
170. Parker C. Extension Connections Help Bring COVID-19 Vaccinations to NYC Neighborhoods [Internet]. Cornell CALS. 2021 [cited 2022 Mar 22]. <https://cals.cornell.edu/news/extension-connections-help-bring-covid-19-vaccinations-nyc-neighborhoods>
171. Mathias W, Nichols KA, Golden-Wright J, Fairman CM, Felder TM, Workman L, et al. Implementation During a Pandemic: Findings, Successes, and Lessons Learned from Community Grantees. *J Cancer Educ*. 2023 Jun; 38(3):957–62. <https://doi.org/10.1007/s13187-022-02213-4> PMID: [36056185](https://pubmed.ncbi.nlm.nih.gov/36056185/)
172. Flores A, Villeda JA, Rodríguez-Fernández R, Chévez AE, Barrera L, Tezaguic R, et al. Advocacy and resource mobilization for rubella elimination in Guatemala. *J Infect Dis*. 2011; 204(suppl\_2):S598–602. <https://doi.org/10.1093/infdis/jir473> PMID: [21954253](https://pubmed.ncbi.nlm.nih.gov/21954253/)
173. Hasan SS, Ma J, Kang F, Song J, Fang-Hollingsworth Y, Sears D. Hepatitis prevention project in the Korean American community in Killeen, Texas. *Bayl Univ Med Cent Proc*. 2015; 28(4):435–7. <https://doi.org/10.1080/08998280.2015.11929299> PMID: [26424934](https://pubmed.ncbi.nlm.nih.gov/26424934/)
174. Oyo-Ita AE, Hanlon P, Nwankwo O, Bosch-Capblanch X, Arikpo D, Esu E, et al. Cost-effectiveness analysis of an intervention project engaging Traditional and Religious Leaders to improve uptake of childhood immunization in southern Nigeria. *PLoS ONE*. 2021 Sep 16; 16(9):e0257277.
175. Warner EL., Fowler B., Martel L., Kepka D. Improving HPV Vaccination Through a Diverse Multi-state Coalition. *J Community Health*. 2017; 42(5):911–20. <https://doi.org/10.1007/s10900-017-0334-7> PMID: [28393294](https://pubmed.ncbi.nlm.nih.gov/28393294/)
176. Weaver B. Faith & Vaccines Launched to Support COVID-19 Vaccination Access and Uptake [Internet]. RESOLVE. 2021 [cited 2022 Mar 22]. <https://www.resolve.ngo/blog/Faith—Vaccines-Launched-to-Support-COVID-19-Vaccination-Access-and-Uptake.htm>
177. Alcendor DJ, Juarez PD, Matthews-Juarez P, Simon S, Nash C, Lewis K, et al. Meharry Medical College Mobile Vaccination Program: Implications for Increasing COVID-19 Vaccine Uptake among Minority Communities in Middle Tennessee. *Vaccines*. 2022 Feb; 10(2):211. <https://doi.org/10.3390/vaccines10020211> PMID: [35214670](https://pubmed.ncbi.nlm.nih.gov/35214670/)
178. Banks AM. World Vision faces pandemic's 'perfect storm,' seeks to meet US, global needs. *Religion News Service* [Internet]. 2021 Apr 9 [cited 2022 Apr 1]; Available from: <https://religionnews.com/2021/04/09/world-vision-faces-pandemics-perfect-storm-seeks-to-meet-us-global-needs/>
179. Choi C. Faith-based organizations help with COVID-19 vaccine outreach [Internet]. <https://www.witn.com>. 2021 [cited 2022 Mar 22]. <https://www.witn.com/2021/02/18/faith-based-organizations-help-with-covid-19-vaccine-outreach/>
180. Abdul-Mutakabbir JC, Casey S, Jews V, King A, Simmons K, Hogue MD, et al. A three-tiered approach to address barriers to COVID-19 vaccine delivery in the Black community. *Lancet Glob Health*. 2021; 9(6):e749–50. [https://doi.org/10.1016/S2214-109X\(21\)00099-1](https://doi.org/10.1016/S2214-109X(21)00099-1) PMID: [33713634](https://pubmed.ncbi.nlm.nih.gov/33713634/)
181. Banks AM. Health care organizations find success with faith-based allies in vaccine distribution. *Religion News Service* [Internet]. 2021 Apr 23; Available from: <https://religionnews.com/2021/04/23/health-care-organizations-find-success-with-faith-based-allies-in-vaccine-distribution/>
182. The White House. FACT SHEET: Biden-Harris Administration Celebrates the Second Anniversary of the Reestablishment of the White House Office of Faith-Based and Neighborhood Partnerships [Internet]. The White House. 2023 [cited 2023 Oct 17]. <https://www.whitehouse.gov/briefing-room/statements-releases/2023/02/17/fact-sheet-biden-harris-administration-celebrates-the-second-anniversary-of-the-reestablishment-of-the-white-house-office-of-faith-based-and-neighborhood-partnerships/>
183. Tjaden J, Haarmann E, Savaskan N. Experimental evidence on improving COVID-19 vaccine outreach among migrant communities on social media. *Sci Rep*. 2022 Sep 28; 12(1):16256. <https://doi.org/10.1038/s41598-022-20340-2> PMID: [36171245](https://pubmed.ncbi.nlm.nih.gov/36171245/)

184. Government of the District Columbia. District of Columbia COVID-19 Vaccination Plan [Internet]. 2021 May p. 58. [https://coronavirus.dc.gov/sites/default/files/dc/sites/coronavirus/page\\_content/attachments/DC\\_COVID-19-Vaccination%20Plan\\_FINAL.pdf](https://coronavirus.dc.gov/sites/default/files/dc/sites/coronavirus/page_content/attachments/DC_COVID-19-Vaccination%20Plan_FINAL.pdf)
185. Moturi AK, Jalang'o R, Cherono A, Muchiri SK, Snow RW, Okiro EA. Malaria vaccine coverage estimation using age-eligible populations and service user denominators in Kenya. *Malar J*. 2023 Sep 27; 22(1):287. <https://doi.org/10.1186/s12936-023-04721-0> PMID: 37759277
186. Khan TM, Chiau LM. Polio vaccination in Pakistan: by force or by volition? *The Lancet*. 2015 Oct 31; 386(10005):1733. [https://doi.org/10.1016/S0140-6736\(15\)00689-3](https://doi.org/10.1016/S0140-6736(15)00689-3) PMID: 26545429
187. WHO. Practical Considerations and recommendations for religious leaders and faith-based communities in the context of COVID-19—interim guidance [Internet]. WHO; 2020 Apr [cited 2022 Mar 25]. [https://apps.who.int/iris/bitstream/handle/10665/331707/WHO-2019-nCoV-Religious\\_Leaders-2020\\_1-eng.pdf](https://apps.who.int/iris/bitstream/handle/10665/331707/WHO-2019-nCoV-Religious_Leaders-2020_1-eng.pdf)
188. WHO and Religions for Peace Global Conference Oct-Dec 2021—YouTube [Internet]. 2021 [cited 2022 Mar 26]. <https://www.youtube.com/playlist?list=PLBcdAT384bQsoHjRgrat8ESxRIHxq1BBn>
189. Strategic Engagement of Religious Leaders in COVID Vaccination Webinar [Internet]. 2021 [cited 2022 Apr 29]. <https://www.youtube.com/watch?v=wbi0ZAYRgMw>
190. Dada D, Djiometio JN, McFadden SM, Demeke J, Vlahov D, Wilton L, et al. Strategies That Promote Equity in COVID-19 Vaccine Uptake for Black Communities: a Review. *J Urban Health*. 2022 Feb 1; 99(1):15–27. <https://doi.org/10.1007/s11524-021-00594-3> PMID: 35018612
191. Monson K, Oluyinka M, Negro D, Hughes N, Maydan D, Iqbal S, et al. Congregational COVID-19 Conversations: Utilization of Medical-Religious Partnerships During the SARS-CoV-2 Pandemic. *J Relig Health* [Internet]. 2021 Aug [cited 2022 Mar 31]; 60(4):2353–61. Available from: <https://link.springer.com/10.1007/s10943-021-01290-x> PMID: 34032973
192. Scott E. N.J. hosts 'Grateful for the Shot' vaccine clinics with faith-based organizations. *WHYY* [Internet]. 2021 May 22 [cited 2022 Mar 22]; <https://whyy.org/articles/n-j-hosts-grateful-for-the-shot-vaccine-clinics-in-collaboration-with-faith-based-organizations/>
193. Qasim R, Farooqui WA, Rahman A, Haroon R, Saleem M, Rafique M, et al. Community centred co-design methodology for designing and implementing socio-behavioural interventions to counter COVID-19 related misinformation among marginalized population living in the squatter settlements of Karachi, Pakistan: a methodology paper. *BMC Proc*. 2023 Jul 12; 17(7):15. <https://doi.org/10.1186/s12919-023-00265-y> PMID: 37438805
194. Stadnick NA, Cain KL, Oswald W, Watson P, Ibarra M, Lagoc R, et al. Co-creating a Theory of Change to advance COVID-19 testing and vaccine uptake in underserved communities. *Health Serv Res*. 2022 Jun; 57(1):149–57. <https://doi.org/10.1111/1475-6773.13910> PMID: 35243622
195. U.S. Department of Health and Human Services. User Guide for Faith-Based Leaders Toolkit [Internet]. HHS COVID-19 Public Education Campaign. 2021 [cited 2022 Nov 17]. <https://wecandothis.hhs.gov/resource/fbo-hispanic-latino-faith-based-leaders-toolkit>
196. Region of Waterloo. Hear Stories From Our Community—YouTube [Internet]. YouTube. 2022 [cited 2022 Jul 2]. [https://www.youtube.com/playlist?list=PLRVDwi\\_WSclmhZuCC4-oyd07nf4-kUZo](https://www.youtube.com/playlist?list=PLRVDwi_WSclmhZuCC4-oyd07nf4-kUZo)
197. Virginia Department of Health. Outreach to racial and ethnic populations encouraging vaccination [Internet]. CIDRAP. [cited 2022 Mar 22]. <https://www.cidrap.umn.edu/practice/outreach-racial-and-ethnic-populations-encouraging-vaccination>
198. Royal College of General Practitioners. GPs call for high-profile campaign backed by faith leaders and prominent figures from BAME communities to increase COVID-19 vaccine uptake [Internet]. 2021 [cited 2022 Apr 7]. <https://www.rcgp.org.uk/about-us/news/2021/february/gps-call-for-high-profile-campaign-backed-by-faith-leaders.aspx>
199. Bishop Noonan J. Immunization Policy—Diocese of Orlando, Florida [Internet]. 2014 [cited 2022 Mar 30]. <https://www.orlandodiocese.org/ministries-offices/schools/schools-parent-information/schools-immunization-policy/>
200. Traynor K. COVID-19 mass vaccination involves unusual venues. *Am J Health Syst Pharm*. 2021; 78(13):1162–4. <https://doi.org/10.1093/ajhp/zxab185> PMID: 33969383
201. Vicente NE, Cordero DA. In the service of the Filipino: the role of Catholic higher education institutions in promoting COVID-19 vaccines in the Philippines. *J Public Health*. 2021; 43(2):e377–8. <https://doi.org/10.1093/pubmed/fdab087> PMID: 33738499
202. Meyer BA, Viskupič F, Wiltse DL. Pharmacists to partner with religious leaders to overcome vaccine hesitancy among Christians. *J Am Pharm Assoc JAPhA*. 2022; 62(1):302–4. <https://doi.org/10.1016/j.japh.2021.08.025> PMID: 34531120
203. Chute S, Chomilo NT, Dionne J, Huntley C, Linde A, Wanduragala D. Structuring Equity Into Minnesota's COVID-19 Response: Lessons Learned and Future Investments. *J Public Health Manag*

- Pract. 2022 Aug; 28(Suppl 4):S159–65. <https://doi.org/10.1097/PHH.0000000000001478> PMID: 35616561
204. Levin J. Human Flourishing in the Era of COVID-19: How Spirituality and the Faith Sector Help and Hinder Our Collective Response. *Challenges*. 2022 Jun; 13(1):12.
  205. Levin J. Partnerships between the faith-based and medical sectors: Implications for preventive medicine and public health. *Prev Med Rep*. 2016 Dec 1; 4:344–50. <https://doi.org/10.1016/j.pmedr.2016.07.009> PMID: 27512649
  206. Choi C. Faith-based organizations help with COVID-19 vaccine outreach. <https://www.witn.com> [Internet]. 2021 Feb 18 [cited 2022 Aug 5]; <https://www.witn.com/2021/02/18/faith-based-organizations-help-with-covid-19-vaccine-outreach/>
  207. Levin J, Idler EL, VanderWeele TJ. Faith-Based Organizations and SARS-CoV-2 Vaccination: Challenges and Recommendations. *Public Health Rep*. 2022 Jan 1; 137(1):11–6. <https://doi.org/10.1177/00333549211054079> PMID: 34694939
  208. Santos TM, Cata-Preta BO, Wendt A, Arroyave L, Hogan DR, Mengistu T, et al. Religious affiliation as a driver of immunization coverage: Analyses of zero-dose vaccine prevalence in 66 low- and middle-income countries. *Front Public Health*. 2022 Oct 25; 10:977512. <https://doi.org/10.3389/fpubh.2022.977512> PMID: 36388274
  209. UNICEF, Meta, Yale Institute for Global Health, Public Good Projects. From insights to impact: Building confidence in routine childhood vaccines in India [Internet]. 2023 [cited 2024 Apr 3]. <https://www.unicef.org/media/135666/file/India-case-study-Building-confidence-in-routine-childhood-vaccines-2023.pdf>
  210. Aghajafari F, Wall L, Weightman AM, Ness A, Lake D, Anupindi K, et al. An exploration of COVID-19 vaccination models for newcomer refugees and immigrants in Calgary, Canada. *Arch Public Health*. 2024 Mar 12; 82(1):33. <https://doi.org/10.1186/s13690-024-01255-y> PMID: 38468290
  211. Skinner NA, Sanders K, Lopez E, Sotz Mux MS, Abascal Miguel L, Vosburg KB, et al. Barriers to COVID-19 vaccine acceptance to improve messages for vaccine uptake in indigenous populations in the central highlands of Guatemala: a participatory qualitative study. *BMJ Open*. 2023 Jan 27; 13(1):e067210. <https://doi.org/10.1136/bmjopen-2022-067210> PMID: 36707110
  212. CDC. Toolkit for Community and Faith-Based Organizations [Internet]. Centers for Disease Control and Prevention. 2020 [cited 2022 Mar 6]. <https://www.cdc.gov/coronavirus/2019-ncov/communication/toolkits/community-faith-based.html>
  213. Ranieri V, Kamboj SK, Edwards SJL. Perceived coercion, perceived pressures and procedural justice arising from global lockdowns during the COVID-19 pandemic: A scoping review. *PLOS Glob Public Health*. 2023 Mar 16; 3(3):e0001250. <https://doi.org/10.1371/journal.pgph.0001250> PMID: 36962987
